## **Multiple Ciliary Localization Signals Control INPP5E Ciliary Targeting**

1 **Dario Cilleros-Rodriguez<sup>1-4,#</sup>, Raquel Martin-Morales<sup>1-4,#</sup>, Pablo Barbeito<sup>1-4</sup>, Abhijit Deb Roy<sup>5</sup>,**  
2 **Abdelhalim Loukil<sup>6</sup>, Belen Sierra-Rodero<sup>1-4</sup>, Gonzalo Herranz<sup>1-2</sup>, Olatz Pampliega<sup>7</sup>, Modesto**  
3 **Redrejo-Rodriguez<sup>1-2</sup>, Sarah C. Goetz<sup>6</sup>, Manuel Izquierdo<sup>1-2</sup>, Takanari Inoue<sup>5</sup>, Francesc R.**  
4 **Garcia-Gonzalo<sup>1-4,\*</sup>**

5 <sup>1</sup>Departamento de Bioquímica, Facultad de Medicina, Universidad Autónoma de Madrid (UAM), Madrid, Spain.

6 <sup>2</sup>Instituto de Investigaciones Biomédicas “Alberto Sols” (IIBM), Consejo Superior de Investigaciones Científicas (CSIC)-  
7 UAM, Madrid, Spain.

8 <sup>3</sup>Instituto de Investigación del Hospital Universitario de La Paz (IdiPAZ), Madrid, Spain.

9 <sup>4</sup>CIBER de Enfermedades Raras (CIBERER), Instituto de Salud Carlos III (ISCIII), Madrid, Spain.

10 <sup>5</sup>Department of Cell Biology, Center for Cell Dynamics, Johns Hopkins University School of Medicine, Baltimore,  
11 Maryland, USA.

12 <sup>6</sup>Department of Pharmacology and Cancer Biology, Duke University School of Medicine, Durham, North Carolina, USA.

13 <sup>7</sup>Department of Neurosciences, University of the Basque Country, Achucarro Basque Center for Neuroscience-  
14 UPV/EHU, Leioa, Spain.

15 <sup>#</sup>These authors contributed equally to this work.

16 **\*Correspondence:** Francesc R. Garcia-Gonzalo ([francesc.garcia@uam.es](mailto:francesc.garcia@uam.es))

17 **Keywords:** INPP5E, cilia, ciliopathy, Joubert syndrome, PDE6D, RPGR, ARL13B, TULP3, CEP164, ATG16L1.

18

### 19 **ABSTRACT.**

20 Primary cilia are sensory membrane protrusions whose dysfunction causes diseases named ciliopathies.  
21 INPP5E is a ciliary phosphoinositide phosphatase mutated in ciliopathies like Joubert syndrome.  
22 INPP5E regulates numerous ciliary functions, such as cilium stability, trafficking, signaling, or  
23 exovesicle release. Despite its key ciliary roles, how INPP5E accumulates in cilia remains poorly  
24 understood. Herein, we show that INPP5E ciliary targeting requires its folded catalytic domain and is  
25 controlled by four ciliary localization signals (CLSs), the first two of which we newly discover:  
26 LLxPIR motif (CLS1), W383 (CLS2), FDRxLYL motif (CLS3) and CaaX box (CLS4). We answer  
27 two long-standing questions in the field. First, partial redundancy between CLS1 and CLS4 explains  
28 why CLS4 is dispensable for ciliary targeting. Second, the essential need for CLS2 on the catalytic  
29 domain surface clarifies why CLS3 and CLS4 are together insufficient for ciliary accumulation.  
30 Furthermore, we reveal that some Joubert syndrome mutations in INPP5E catalytic domain affect its  
31 ciliary targeting, and shed light on the mechanisms of action of each CLS. Thus, we find that CLS2  
32 and CLS3 promote interaction with TULP3 and ARL13B, while downregulating CEP164 binding. On  
33 the other hand, CLS4 recruits PDE6D, RPGR and ARL13B, and cooperates with CLS1 in ATG16L1  
34 binding. Lastly, we show INPP5E immune synapse targeting is CLS-independent. Altogether, we  
35 reveal unusual complexity in INPP5E ciliary targeting mechanisms, likely reflecting its multiple key  
36 roles in ciliary biology.

## Multiple CLSs Target INPP5E to Cilia

### 37 INTRODUCTION

38 Primary cilia are solitary membrane protrusions acting as cellular antennae. They emanate from the  
39 basal body, a specialized mother centriole, and consist of a microtubule shaft, or axoneme, surrounded  
40 by the ciliary membrane, which is topologically continuous with, but compositionally distinct from,  
41 the plasma membrane (PM). For cilia to perform their signaling functions, they must accumulate  
42 specific receptors and signal transducers. For this to happen, these proteins must first reach the ciliary  
43 base, from where they can enter cilia by crossing the transition zone (TZ), the border region separating  
44 the ciliary compartment from the rest of the cell. If they can make it inside cilia, the ciliary levels of  
45 these proteins will then depend on the balance between ciliary entry and exit rates, a balance that can  
46 shift over time. Ciliary entry and exit rates in turn depend on how proteins interact with TZ components,  
47 and on whether they associate with specialized ciliary trafficking machinery, such as intraflagellar  
48 transport (IFT) trains, microtubule motor-driven multiprotein assemblies whose components, like the  
49 IFT-B, IFT-A and BBSome complexes, selectively bind ciliary cargoes to mediate their transport into  
50 or out of cilia <sup>1-3</sup>.

51 Ciliary malfunction causes ciliopathies, a diverse group of human diseases, many of which are rare  
52 autosomal recessive syndromes. One such disease is Joubert syndrome (JBTS), affecting  $\approx 1$  in 100,000  
53 people worldwide and whose pathognomonic signature is the molar tooth sign (MTS), a cerebellar and  
54 midbrain malformation observable by magnetic resonance imaging (MRI). JBTS patients may also  
55 present with mild to severe intellectual disability, hypotonia, ataxia, oculomotor apraxia,  
56 apnea/hyperpnea, polydactyly, kidney cysts and retinal dystrophy. Genetically, JBTS can be caused by  
57 mutations in over 30 different genes, all involved in ciliary function <sup>2,4-6</sup>.

58 More specifically, JBTS-causative genes regulate a ciliary signaling network, one of whose main nodes  
59 is the ciliary phosphoinositide phosphatase INPP5E (Inositol polyphosphate-5-phosphatase E,  
60 formerly known as Pharbin, or as type IV 72 kDa 5-phosphatase) <sup>7-11</sup>. Evidence for the central role of  
61 INPP5E in JBTS includes: (i) INPP5E is one of the most commonly mutated JBTS genes <sup>6</sup>; (ii) mouse  
62 models of INPP5E loss of function recapitulate key features of human JBTS, including the axon tract  
63 defects leading to MTS in humans <sup>7,12</sup>; (iii) most other JBTS genes encode proteins required for  
64 INPP5E ciliary targeting <sup>3,5,13-20</sup>; and (iv) the few JBTS genes that may not be needed for INPP5E  
65 ciliary targeting regulate the same pathways as INPP5E, like Hedgehog (Hh) signaling or ciliary  
66 stability <sup>21-27</sup>.

## Multiple CLSs Target INPP5E to Cilia

67 Almost all JBTS-causing INPP5E mutations are missense mutations affecting its catalytic domain  
68 <sup>6,28,29</sup>. In all cases tested, these mutations impaired 5-phosphatase activity towards one or both of its  
69 main substrates, PI(4,5)P<sub>2</sub> and PIP<sub>3</sub> <sup>8,29</sup>. INPP5E mutations can also cause other ciliopathies, including  
70 retinitis pigmentosa (RP), Leber congenital amaurosis (LCA), and MORM syndrome (Mental  
71 retardation, Obesity, Retinal dystrophy and Micropenis in males). Unlike JBTS, RP and LCA, the  
72 MORM mutation does not affect the catalytic domain, instead removing INPP5E's C-terminal CaaX  
73 box, whose farnesylation tethers INPP5E to membrane <sup>7,29-31</sup>. Besides its catalytic domain and C-  
74 terminus, INPP5E also contains a proline-rich N-terminal region, where no ciliopathy mutations have  
75 been reported <sup>7-11,29</sup>.

76 INPP5E plays multiple important roles at the cilium. Among others, these roles include regulation of:  
77 (i) ciliary phosphoinositide levels, (ii) ciliary protein composition, (iii) ciliary Hedgehog and PI3K  
78 signaling, (iv) ciliary ectovesicle release, (v) ciliary stability, and (vi) ciliogenesis <sup>7,8,12,32-45</sup>. Although  
79 most of its functions are ciliary, INPP5E also plays extraciliary roles, like promoting autophagosome-  
80 lysosome fusion during autophagy <sup>46</sup>.

81 Two motifs in INPP5E protein sequence are known to affect its ciliary targeting: the FDRxLYL motif  
82 (aa 609-615) and the CaaX box (aa 641-644), both located in the C-terminal region after the  
83 phosphatase domain (aa 297-599) <sup>7,17,18,47-49</sup>. The CaaX box is not essential for INPP5E ciliary  
84 localization, but CaaX box mutants show reduced ciliary targeting, while increasing its proportion at  
85 the ciliary base and elsewhere <sup>7,17,47</sup>. CaaX box farnesylation allows INPP5E to bind phosphodiesterase  
86 6 subunit delta (PDE6D), a prenyl-binding protein that extracts INPP5E from the ciliary base  
87 membrane and ferries it across the transition zone. Once inside the cilium, the active form of the  
88 monomeric G-protein ADP ribosylation factor (ARF)-like 3 (ARL3) induces dissociation of the  
89 PDE6D-INPP5E complex, thus releasing the farnesyl group for insertion into the ciliary membrane.  
90 For this to happen, ARL3 must first be activated by a guanine nucleotide exchange factor (GEF)  
91 complex consisting of ARF-like 13B (ARL13B), an atypical small G-protein, and its cofactor Binder  
92 of ARL2 (BART) <sup>17,18,48,50-53</sup>.

93 Intriguingly, despite INPP5E farnesylation not being essential for ciliary targeting, the latter is  
94 completely dependent on PDE6D, ARL3 and ARL13B, all of them also JBTS-causative genes <sup>5,16-18</sup>.  
95 Although the reason for this apparent discrepancy is unknown, part of the answer might relate to the  
96 retinitis pigmentosa GTPase regulator (RPGR), an RP-associated protein required for INPP5E ciliary

## Multiple CLSs Target INPP5E to Cilia

97 targeting, and whose own ciliary localization depends on its geranylgeranylated CaaX box binding to  
98 PDE6D<sup>54-60</sup>.

99 Regarding ARL13B, its direct interaction with INPP5E probably explains its strong requirement for  
100 INPP5E ciliary targeting<sup>18,48,49</sup>. This interaction is mediated by the FDRxLYL motif, which, unlike  
101 the CaaX box, is absolutely required for INPP5E ciliary localization<sup>18</sup>. Ciliary localization of ARL13B  
102 is in turn dependent on Tubby-like protein 3 (TULP3), a phosphoinositide-binding adaptor that links  
103 ciliary membrane cargoes to IFT trains<sup>34,61-64</sup>. This probably explains why TULP3 is also required for  
104 INPP5E ciliary targeting, although a more direct connection between TULP3 and INPP5E might also  
105 exist<sup>61,64</sup>. Other proteins needed for INPP5E ciliary targeting include the centrosomal protein of 164  
106 kDa (CEP164), which is involved in INPP5E recruitment to the ciliary base<sup>18,39,65-67</sup>, and the  
107 autophagy-related protein 16-like 1 (ATG16L1), also implicated in ciliogenesis and ciliary trafficking  
108<sup>68,69</sup>.

109 Although the C-terminal region of INPP5E contains both FDRxLYL motif and CaaX box, this region  
110 alone is not sufficient to target INPP5E to cilia. In contrast, a fragment containing both phosphatase  
111 domain and C-terminal region suffices for ciliary accumulation<sup>18</sup>. This indicates that something in or  
112 near the catalytic domain is also essential for ciliary targeting, but the reasons for this requirement are  
113 unknown.

114 Herein, we start by elucidating why the catalytic domain is required for ciliary targeting. There are two  
115 reasons for this: (i) the FDRxLYL motif is part of the catalytic domain's globular fold, even though  
116 the motif is outside the conserved domain as defined by primary sequence analysis; and (ii) a key  
117 catalytic domain residue, W383, which is physically adjacent to the FDRxLYL motif in the domain's  
118 crystal structure, is also specifically and strongly required for ciliary accumulation. We then resolve  
119 another lingering question in the field: why the CaaX box is dispensable for INPP5E ciliary  
120 localization. We show that the CaaX box is partially redundant with the LLxPIR motif, located near  
121 the end of the N-terminal region. Thus, while single deletion of CaaX box or LLxPIR moderately  
122 reduces ciliary targeting, simultaneous deletion of both completely abolishes it. Therefore, we reveal  
123 that INPP5E ciliary accumulation depends on the interplay between four different ciliary localization  
124 signals (CLS1-4), the first two of which we newly identify here: the LLxPIR motif (CLS1), W383  
125 (CLS2), the FDRxLYL motif (CLS3) and the CaaX box (CLS4). In the second half of this work, we  
126 systematically examine how each of these CLSs affects INPP5E interactions with proteins required for  
127 its ciliary targeting. Through this approach, we find that CLS2 and CLS3 function by promoting

## Multiple CLSs Target INPP5E to Cilia

128 interaction with TULP3 and ARL13B, while also antagonizing CEP164 binding. On the other hand,  
129 CLS4 is needed for association to PDE6D, RPGR and, in cooperation with CLS1, to ATG16L1.  
130 Altogether, our data represent a major step forward in the field and reveal an unprecedented degree of  
131 complexity in the ciliary targeting mechanisms of INPP5E, as compared to other known ciliary cargoes,  
132 for which a single or at most two CLSs suffice to explain ciliary accumulation <sup>1,70-73</sup>.

## 133 RESULTS

### 134 INPP5E catalytic domain encompasses the FDRxLYL motif and is required for ciliary targeting

135 Ciliary accumulation of human INPP5E requires the conserved FDRxLYL motif (aa 609-615) <sup>18</sup>. This  
136 motif lies downstream of INPP5E's highly conserved phosphatase domain, as defined by the InterPro  
137 protein signature database (InterPro domain IPR000300, aa 297-599) <sup>18,74</sup>. However, INPP5E crystal  
138 structure reveals a more extensive globular phosphatase domain, spanning residues 282-623, on whose  
139 surface the FDRxLYL motif folds (PDB ID: 2xsw) (**Fig.1a**) <sup>75</sup>. Indeed, the crystallographic data show  
140 that the FDRxLYL motif, and the alpha-helix it is nested in, interact with several other catalytic domain  
141 residues (such interactions include D610-L362, Y614-P358, R620-E347 and R621-E354). Recently, a  
142 3D model of full length INPP5E was generated using AlphaFold, a remarkably accurate machine  
143 learning algorithm for protein structure prediction <sup>76</sup>. The AlphaFold model closely matches the crystal  
144 structure, including the FDRxLYL motif's structure and location. Thus, based on the structural data,  
145 we conclude that INPP5E's catalytic domain spans residues 282-623, and therefore encompasses the  
146 FDRxLYL motif, which lies on the domain's surface. Accordingly, from now on, when we speak of  
147 the catalytic or phosphatase domain, we will be referring to the globular domain spanning residues  
148 282-623, unless we specify otherwise.

149 To clarify how INPP5E's phosphatase domain controls ciliary targeting, we generated a series of  
150 INPP5E deletion mutants lacking different portions of the N or C-terminal regions, or lacking only the  
151 InterPro-defined catalytic domain (**Fig.1b**). Interestingly, INPP5E ciliary accumulation closely  
152 correlated with the presence of an intact structurally-defined catalytic domain (aa 282-623) (**Fig.1b-c**).  
153 Deletion of the InterPro-defined catalytic domain ( $\Delta$ 297-599) completely abolished ciliary targeting in  
154 EGFP-INPP5E-transfected hTERT-RPE1 cells (**Fig.1c**). N-terminal deletions not affecting the  
155 phosphatase domain did not affect ciliary localization, as was the case for constructs 100-644, 200-  
156 644, 251-644 and 274-644 (**Fig.1c**). In contrast, 288-644 displayed strongly reduced ciliary targeting,  
157 and 351-644, 451-644 and 551-644 completely failed to localize to cilia (**Fig.1c**). C-terminal deletions

## Multiple CLSs Target INPP5E to Cilia

158 showed a similar pattern. As previously reported, the MORM mutant (1-626) was found inside cilia  
159 and at the ciliary base, and the same was true for 1-623 (**Fig.1c**)<sup>7</sup>. The 1-621 mutant was only  
160 occasionally ciliary, at low levels near the ciliary base (**Fig.1c**). Further deletions from the C-terminus  
161 resulted in complete loss of ciliary targeting, as was the case for 1-618, 1-616, 1-608 and 1-283  
162 (**Fig.1c**). Hence, integrity of the structurally-defined catalytic domain is essential for INPP5E ciliary  
163 accumulation.

### 164 **W383 and FDRxLYL function as specific CLSs on the catalytic domain surface**

165 We first confirmed that, as previously reported, the FDRxLYL motif is essential for INPP5E ciliary  
166 targeting (**Fig.2a**)<sup>18</sup>. Mutation to alanines of both the FDR (aa 609-611) and LYL (aa 613-615) triplets  
167 completely abolished ciliary localization (**Fig.2a**). To assess the relative importance of each residue  
168 within the FDRxLYL motif, we also made the individual alanine mutants (F609A, D610A, R611A,  
169 E612A, L613A, Y614A, L615A). Surprisingly, all of them still localized to cilia, indicating  
170 redundancy within the FDR and LYL triplets (**Fig.S1**).

171 Given that the FDRxLYL motif lies on the catalytic domain surface (**Fig.1a**), and that catalytic domain  
172 integrity is essential for ciliary targeting (**Fig.1b-c**), we hypothesized that INPP5E ciliary targeting  
173 relies on a catalytic domain surface including not only the FDRxLYL residues, but also other residues  
174 whose proximity to FDRxLYL is dependent upon a folded domain. To test this, we examined the 3D  
175 structure of INPP5E's catalytic domain (PDB ID: 2XSW) in order to identify candidate residues for  
176 this putative surface. We did this by selecting residues meeting all or most of the following criteria: (i)  
177 located near FDRxLYL motif, on same side of domain; (ii) high exposure to solvent; and (iii) highly  
178 conserved in vertebrate INPP5E orthologs. Out of this analysis, we selected sixteen candidate residues:  
179 R345, R346, E347, W348, E349, Q353, E354, Y360, V361, R378, R379, D380, I382, W383, F384,  
180 E387. Alanine mutation of most of these residues did not affect ciliary targeting of EGFP-INPP5E in  
181 hTERT-RPE1 cells (**Fig.2b-c**). Exceptions were W348A, Y360A, W383A and R378A+R379A, all of  
182 which completely failed to accumulate in cilia (**Fig.2c-d**). The R378 and R379 arginines are redundant,  
183 as the double but not single mutations impeded cilia localization (**Fig.2c-d**).

184 Mistargeting of these four mutants could be due to loss of catalytic domain integrity, which is critical  
185 for ciliary targeting (**Fig.1**). If so, then phosphatase activity would also be disrupted in these mutants.  
186 To test this, we immunoprecipitated these EGFP-INPP5E mutants from transfected HEK293T lysates  
187 and measured their PI(4,5)P<sub>2</sub> 5-phosphatase activity in the immunoprecipitates (IPs). EGFP-INPP5E

## Multiple CLSs Target INPP5E to Cilia

188 wild type was used as positive control, whereas negative controls included: (i) a reaction with substrate  
189 but no enzyme, to assess the rate of basal PI(4,5)P<sub>2</sub> dephosphorylation; and (ii) the catalytically inactive  
190 D477N INPP5E mutant, lacking a critical active site aspartate but normally localizing to cilia <sup>8,11,32,77,78</sup>.

191 Compared to negative controls, phosphate release by WT was about 12-fold faster, a very significant  
192 difference (**Fig.2e**). W348A and Y360A were completely inactive, and R378A+R379A nearly so  
193 (**Fig.2e**). Hence, lack of ciliary targeting in these mutants may be non-specific. Unlike R378A+R379A,  
194 the cilia-localized R378A and R379A single mutants retained activity, either fully (R378A) or partially  
195 (R379A). Like R379A, W383A was half as active as WT, with a very significant  $\approx$ 6-fold increase over  
196 negative controls (**Fig.2e**). The same was true for the LYL triplet mutant, whereas the FDR mutant was  
197 somewhat less active, with a  $\approx$ 3-fold increase over controls (**Fig.2a-e**). Quantitation by anti-EGFP  
198 immunoblot of the protein levels of each mutant in the IPs used to measure activities revealed no  
199 significant differences for any of the mutants, suggesting that activity differences mostly reflect  
200 changes in intrinsic enzyme properties, rather than changes in protein stability (**Fig.2f**).

201 These data suggest that W383 and FDRxLYL function as *bona fide* CLSs, as their strict requirement  
202 for ciliary targeting cannot fully be accounted for by their moderate effects on enzyme activity.  
203 Accordingly, R379A, a mutation immediately adjacent to FDRxLYL and W383, displayed the same  
204 moderate effects on activity, but had no effect on ciliary localization (**Fig.2b-f**).

205 Still, the partial activity loss in W383A and FDRxLYL mutants suggests that catalytic domain integrity  
206 may be partially lost as well. To examine this further, we assessed the half-lives of these mutants in  
207 HEK293T cells using the protein translation inhibitor cycloheximide (**Fig.S2**). After 5, 10 or 24 hours  
208 in cycloheximide, EGFP-INPP5E(WT) levels were virtually unaffected, indicating a long half-life of  
209 several days. For W383A and the triplet FDR and LYL mutants, initial levels were not significantly  
210 different from WT (**Fig.S2a-b**). From those initial levels (100%), W383A fell to 60% in the first 10  
211 hours, but then remained at 60% by 24 hours, rather than diminishing further (**Fig.S2c**). Similar results  
212 were seen for the FDR mutant, whereas LYL's curve ran closer to WT's (**Fig.S2c**).

213 Thus, W383A showed a biphasic kinetics, whose most parsimonious explanation appears to be the  
214 existence of two protein populations:  $\approx$ 40% of W383A would be unstable with a half-life of  $\approx$ 5 hours,  
215 whereas the remaining  $\approx$ 60% would be stable, with a half-life of days, like WT (**Fig.S2c**). Presumably,  
216 the unstable form would not be properly folded and would be inactive, whereas the stable form would  
217 be folded and active, which would explain why W383A reduces activity  $\approx$ 2-fold (**Fig.2e**). Although

## Multiple CLSs Target INPP5E to Cilia

218 this model remains speculative, the fact that  $\approx$ 50-60% of W383A is stable and enzymatically active  
219 supports the idea that W383 is a *bona fide* CLS, since loss of ciliary targeting in W383A is virtually  
220 complete, and much stronger than a 2-fold reduction (**Fig.2c-d**). Similar points support the specificity  
221 of FDRxLYL as CLS.

222 We also explored how W383 substitution to residues other than alanine affects ciliary targeting and  
223 enzyme activity (**Fig.S3**). To do this, we mutated W383 to another aromatic residue (W383F), to  
224 several aliphatic residues (W383I, W383L, W383M, W383V), or to acid (W383E) or basic (W383R)  
225 residues. Interestingly, W383F was fully active and ciliary, indicating that an aromatic ring at this  
226 position suffices for both functions (**Fig.S3**). In contrast, all other mutations fully suppressed ciliary  
227 targeting, like W383A (**Fig.S3a**). Interestingly, enzyme activity of W383I, W383L, W383M and  
228 W383V was the same as for W383A, suggesting that an aromatic ring in this position is important for  
229 both targeting and activity (**Fig.S3b-c**). Overall, the data in this section show that W383 and  
230 FDRxLYL, despite their moderate effects on enzyme activity, function as specific CLSs to target  
231 INPP5E to cilia.

### 232 **The LLxPIR motif cooperates with the CaaX box to target INPP5E to cilia**

233 Besides W383 and FDRxLYL, the C-terminal CaaX box (641-CSVS-644) also modulates INPP5E  
234 ciliary targeting. Although CaaX box deletion causes mistargeting of some INPP5E molecules to the  
235 ciliary base or other cellular membranes, CaaX box mutants still accumulate in cilia (**Fig.1c**)<sup>7,17,47</sup>.  
236 This is somewhat puzzling, as INPP5E ciliary targeting strongly depends on the farnesyl receptor  
237 PDE6D<sup>17</sup>.

238 In the course of our experiments, we made a serendipitous observation that led us to novel insights into  
239 how non-farnesylated INPP5E manages to still accumulate in cilia. Initially, we found that INPP5E's  
240 N-terminus (aa 1-273), while being dispensable for ciliary targeting of full length INPP5E (**Fig.1b-c**),  
241 is required for ciliary targeting of INPP5E's MORM mutant ( $\Delta$ 627-644) (**Fig.3e**). We subsequently  
242 saw that this effect of the N-terminus is mediated by residues 251-273, and that these residues are  
243 strongly required for ciliary targeting of the C641S mutant, in which the farnesylated CaaX box  
244 cysteine is replaced by non-farnesylatable serine (**Fig.3a-c**). Thus, while both  $\Delta$ 251-273 and C641S  
245 single mutants localized inside cilia, the double ( $\Delta$ 251-273)+C641S mutant completely failed to do so,  
246 despite accumulating at the ciliary base (**Fig.3a-c**). Interestingly, upon careful observation and  
247 quantitation, both single mutants already showed a partial loss of intraciliary targeting, aside from their



## Multiple CLSs Target INPP5E to Cilia

248 ciliary base accumulation (**Fig.3a-c**). Thus, the single  $\Delta 251-273$  mutant behaves as previously reported  
249 for CaaX mutants (and as shown here for C641S), except that  $\Delta 251-273$  reduces ciliary targeting even  
250 more than C641S (**Fig.3c**). These data indicate that the CaaX box and residues 251-273 cooperate to  
251 target INPP5E to cilia: not only are both sequences required for optimal ciliary targeting of the wild  
252 type protein, but their functions are partially redundant, each becoming essential when the other one is  
253 missing (**Fig.3a-c**).

254 Even though both these mutations are outside the phosphatase domain, it remains possible that their  
255 effects on ciliary targeting are due to disruption of catalytic domain integrity. To test this, we measured  
256 the PI(4,5)P<sub>2</sub> 5-phosphatase activity of the aforementioned 274-626 mutant, lacking both the N-  
257 terminus ( $\Delta 1-273$ ) and the MORM region ( $\Delta 627-644$ ). This mutant was fully active, with activity and  
258 protein levels indistinguishable from WT (**Fig.S4**). In contrast, the 288-626 mutant, additionally  
259 missing residues 275-287 at the beginning of the catalytic domain, had much less activity and reduced  
260 levels (**Fig.S4**). Therefore, residues 251-273 and 627-644 are completely dispensable for enzyme  
261 activity, indicating that their effects on ciliary targeting are not caused by disruptions in the phosphatase  
262 domain. In other words, 251-273 and the CaaX box also behave as *bona fide* CLSs.

263 We then mapped which residues within 251-273 are responsible for CLS function. To do this, we  
264 started with the 274-626 mutant, which fails to accumulate in cilia as mentioned above. To this mutant,  
265 we gradually added residues to the N-terminus, thus creating four more mutants: 269-626, 264-626,  
266 257-626 and 251-626 (**Fig.3d**). Of these, 269-626 and 264-626 failed to accumulate in cilia, whereas  
267 257-626 and 251-626 readily did so (**Fig.3e**). Next, starting from 257-626, we generated five alanine-  
268 substitution mutants within the 257-FSLLAPIRSKDV-268 region, removing residues FS, LL, PIR, SK  
269 and DV, respectively (**Fig.3f**). Of these, residues LL and PIR were essential for ciliary targeting,  
270 whereas FS, SK and DV were fully dispensable (**Fig.3f-g**). We then created the single residue mutants  
271 spanning the 259-LLAPIR-264 motif. All these mutants (L259A, L260A, P262A, I263A and R264A)  
272 abolished cilia localization of 257-626, although weak residual targeting was still observed only for  
273 L259A (**Fig.3f-g**). Therefore, the LLxPIR motif is a novel CLS that cooperates with the CaaX box to  
274 mediate optimal ciliary targeting of INPP5E.

### 275 INPP5E ciliary targeting is mediated by four conserved CLSs

276 The above data indicate that INPP5E ciliary targeting depends on four CLSs, which we will heretofore  
277 refer to as CLS1 (the LLxPIR motif, aa 259-264), CLS2 (W383), CLS3 (the FDRxLYL motif, aa 609-

## Multiple CLSs Target INPP5E to Cilia

278 615), and CLS4 (the CaaX box, aa 641-644). Our data actually show that CLS3 goes beyond the  
279 FDRxLYL motif, as deletion of residues 616-621 also interferes with ciliary targeting (**Fig.1b-c**). This  
280 is consistent with the original report on CLS3, where residues 619-621 were also shown to modulate  
281 ciliary targeting<sup>18</sup>. Thus, CLS3 spans residues 609-621 in human INPP5E.

282 Since INPP5E ciliary targeting has been reported in different vertebrate species, we examined whether  
283 CLS1-4 are conserved in vertebrate evolution. To do this, we aligned the human INPP5E sequence  
284 with those of another mammal (mouse), a bird (crow), a reptile (python), an amphibian (toad) and a  
285 fish (zebrafish) (**Fig.4a**). From this analysis, it is clear that all four CLSs are highly conserved in  
286 vertebrates. For CLS1, the consensus sequence is [VL]LxPIR, with only the first leucine admitting a  
287 conservative change (**Fig.4a; Fig.3g**). CLS2's tryptophan is fully conserved, and so is CLS3, as  
288 previously shown (consensus: FDRxLYLxGI[KR]RR) (**Fig.4a**)<sup>18</sup>. For CLS4 the consensus is  
289 C[ST][IV]S, which in all cases encodes a farnesyl transferase-specific CaaX box<sup>79</sup>. Thus, the four  
290 CLSs are highly conserved. Moreover, they are all found on the same side of INPP5E according to the  
291 Alphafold model (**Fig.4b**)<sup>76</sup>.

### 292 Ciliary targeting is affected by some INPP5E ciliopathy mutations

293 INPP5E ciliary targeting is dependent on CLS1, CLS2, CLS3 and CLS4 (**Figs.2-3**), and on the integrity  
294 of its catalytic domain (**Fig.1**). The MORM mutation ( $\Delta$ 627-644), which deletes CLS4 and moderately  
295 reduces cilia localization, as mentioned above, is the only known INPP5E ciliopathy mutation affecting  
296 its ciliary targeting. However, whether and how other ciliopathy mutations in INPP5E also affect ciliary  
297 targeting is largely unknown. To address this, we sought ciliopathy mutations locating near a CLS, or  
298 that were likely to compromise catalytic domain integrity. In this manner, we identified twelve  
299 mutations, eleven from JBTS and one from LCA-like disease (**Fig.4c-d**)<sup>6,8,28-31</sup>.

300 One of the mutations, C641R, replaces the farnesylatable cysteine in CLS4 by an arginine. Not  
301 surprisingly, this mutation affected ciliary targeting in the same way as C641S or MORM (**Fig.4d-e**).  
302 Several other mutations affected residues located near the CLS2-CLS3 region. This included R345S,  
303 T355M, R378C, C385Y, V388L, R621Q and R621W. None of these affected ciliary localization  
304 (**Fig.4d-e,h**). Since almost all INPP5E ciliopathy mutations affect the catalytic domain, none were  
305 found near CLS1. The closest one to CLS1 was G286R, at the beginning of the catalytic domain.  
306 Interestingly, G286R largely abolished ciliary targeting, although this is more likely due to its affecting  
307 catalytic domain integrity (**Fig.4d-f**). We also tested mutations, like W474R and V303M, that we

## Multiple CLSs Target INPP5E to Cilia

308 thought likely to disrupt the catalytic domain, given their location at the core of the beta-sandwich.  
309 Indeed, W474R abolished ciliary targeting, and V303M reduced it considerably (**Fig.4d-e,g**). Since  
310 W474R and G286R were found in homozygosis in JBTS patients, this suggests that some JBTS patients  
311 cannot target INPP5E to cilia (**Fig.4c,e**). Finally, we also tested the D490Y mutation, located near a  
312 beta-hairpin close to the active site, but far from any CLS. D490Y did not affect ciliary targeting, so it  
313 probably does not affect domain integrity (**Fig.4d-f**). Altogether, these data show that INPP5E ciliary  
314 targeting is sometimes affected in Joubert syndrome, which could contribute to pathogenesis in these  
315 cases.

### 316 **INPP5E binding to PDE6D is CLS4-dependent**

317 After identifying novel INPP5E CLSs and exploring their role in ciliopathies, we focused on the  
318 mechanisms of action of these CLSs. Presumably, these CLSs act by binding to other proteins  
319 implicated in INPP5E ciliary targeting. One such protein is PDE6D, a ciliary cargo receptor for  
320 prenylated proteins. Although PDE6D binding to INPP5E is CLS4-dependent and CLS3-independent,  
321 whether its interaction requires our newly identified CLSs (CLS1 and CLS2) is unknown<sup>17,18,49,55</sup>. To  
322 test this, we cotransfected HEK293T cells with plasmids encoding Flag-PDE6D and EGFP-INPP5E in  
323 order to perform coimmunoprecipitation (co-IP) experiments (**Fig.5a**). As expected, Flag-PDE6D  
324 robustly co-immunoprecipitated (co-IPed) with EGFP-INPP5E(WT), but not EGFP control (**Fig.5a**).  
325 This interaction was completely dependent on CLS4, and completely independent of CLS1, CLS2 and  
326 CLS3 (**Fig.5a**). The mutations used to ascertain this were:  $\Delta$ 251-273 ( $\Delta$ CLS1), W383A ( $\Delta$ CLS2),  
327 F609A+D610A+R611A ( $\Delta$ CLS3) and C641S ( $\Delta$ CLS4). The double ( $\Delta$ 251-273)+C641S mutant  
328 ( $\Delta$ CLS1+4) behaved the same as  $\Delta$ CLS4 (**Fig.5a**). We also tested whether the interaction involved  
329 INPP5E's N-terminal (aa 1-283) or C-terminal (251-644) regions, with the latter being the case for  
330 PDE6D (**Fig.5a**).

331 In addition to co-IP, we also studied the INPP5E-PDE6D interaction in vivo by means of co-  
332 recruitment assays (**Fig.5b-c**). To do this, we generated bait constructs expressing mCherry-FKBP-  
333 INPP5E fusion proteins (WT,  $\Delta$ CLS1,  $\Delta$ CLS2,  $\Delta$ CLS3,  $\Delta$ CLS4 or  $\Delta$ CLS1+4), or mCherry-FKBP as  
334 negative control. Each of these bait constructs was separately co-expressed in HeLa cells with the prey  
335 construct (mVenus-PDE6D), and with FRB-CFP-CaaX, whose prenylated CaaX box tethers FRB to  
336 the inner leaflet of the plasma membrane (**Fig.5b**). Upon inducing the FKBP-FRB interaction with  
337 rapamycin, this should recruit bait constructs to the plasma membrane, a recruitment that can be

## Multiple CLSs Target INPP5E to Cilia

338 monitored and quantitated by total internal reflection fluorescence (TIRF) microscopy <sup>80,81</sup>.  
339 Additionally, if bait and prey interact, then prey co-recruitment to the plasma membrane will also be  
340 observed (**Fig.5b-c**). As expected, rapamycin induced robust plasma membrane recruitment of all bait  
341 constructs (**Fig.5d**). Also as expected, mVenus-PDE6D co-recruitment was much higher with  
342 mCherry-FKBP-INPP5E(WT) than with the mCherry-FKBP control, confirming the specificity of  
343 PDE6D-INPP5E binding. As observed in the co-IPs, mVenus-PDE6D co-recruitment was strongly  
344 reduced by both the  $\Delta$ CLS4 and  $\Delta$ CLS1+4 mutations, indicating a strong CLS4-dependence (**Fig.5d-**  
345 **e**). Also consistent with the co-IPs,  $\Delta$ CLS1 and  $\Delta$ CLS3 did not affect the interaction, whereas  $\Delta$ CLS2  
346 caused a modest reduction in mVenus-PDE6D co-recruitment (**Fig.5d-e**). Altogether, the co-IP and in  
347 vivo co-recruitment data demonstrate that CLS4 is the key CLS controlling INPP5E-PDE6D binding.

### 348 **INPP5E binding to RPGR is CLS4-dependent**

349 RPGR also interacts with INPP5E and is required for its ciliary targeting <sup>55</sup>. Moreover, RPGR ciliary  
350 targeting is also dependent on PDE6D, which binds to both its geranylgeranylated CaaX box and its  
351 RCC1-like domain <sup>54-60</sup>. Despite all these connections, how RPGR mediates INPP5E ciliary targeting  
352 is unclear. To address this, we performed co-IPs between Flag-RPGR and the same EGFP-INPP5E  
353 constructs used above for the PDE6D co-IPs. As with PDE6D, the INPP5E-RPGR interaction was  
354 abolished by  $\Delta$ CLS4 and  $\Delta$ CLS1+4, but was untouched by  $\Delta$ CLS1,  $\Delta$ CLS2 or  $\Delta$ CLS3 (**Fig.S5**).  
355 Therefore, INPP5E's farnesylated CaaX box is also key for its binding to RPGR. Consistently, RPGR  
356 strongly interacted with INPP5E's C-terminal fragment (251-644) but not with the N-terminal one (1-  
357 283).

### 358 **INPP5E binding to ARL13B is promoted by CLS2, CLS3 and CLS4**

359 ARL13B is another key mediator of INPP5E ciliary targeting <sup>18,48,49</sup>. ARL13B regulates INPP5E in at  
360 least two different ways. First, ARL13B acts as a guanine nucleotide exchange factor (GEF) for ARL3,  
361 whose active GTP-bound form promotes dissociation of the PDE6D-INPP5E complex after it reaches  
362 the ciliary lumen <sup>50-53</sup>. Additionally, ARL13B directly interacts with INPP5E and is required for its  
363 ciliary retention <sup>18,48,49</sup>. Since the first mechanism is mediated by ARL3, we checked whether INPP5E  
364 binds ARL3. However, we detected no co-IP between EGFP-INPP5E and ARL3-myc, or its  
365 constitutively active form ARL3(Q71L)-myc, in accordance with previous data (**data not shown**) <sup>18</sup>.  
366 Likewise, we found no interaction between INPP5E and BART, a protein that cooperates with  
367 ARL13B as a co-GEF for ARL3 (**data not shown**) <sup>53</sup>.

## Multiple CLSs Target INPP5E to Cilia

368 We then carried out co-IPs to assess the CLS-dependence of the ARL13B-INPP5E interaction. We  
369 readily detected co-IP of endogenous ARL13B with EGFP-INPP5E in HEK293T cells. This co-IP was  
370 largely abolished with  $\Delta$ CLS4 and  $\Delta$ CLS1+4, and somewhat reduced with  $\Delta$ CLS2 and  $\Delta$ CLS3. In  
371 contrast,  $\Delta$ CLS1 had no effect (**Fig.6a**). As with PDE6D and RPGR, INPP5E's C-terminal region (251-  
372 644), but not the N-terminal (1-283), sufficed for the INPP5E-ARL13B interaction (**Fig.6a**). Thus, co-  
373 IP experiments indicated that CLS2, CLS3 and CLS4 played a role in ARL13B binding. This was fully  
374 corroborated by co-recruitment assays like those in **Fig.5**, in which ARL13B-EYFP was used as prey  
375 instead of mVenus-PDE6D (**Fig.6b**). ARL13B-EYFP co-recruitment strongly increased with  
376 mCherry-FKBP-INPP5E(WT), as compared to mCherry-FKBP alone, demonstrating a specific  
377 interaction. This interaction was unaffected by  $\Delta$ CLS1 but strongly reduced with  $\Delta$ CLS2,  $\Delta$ CLS3,  
378  $\Delta$ CLS4 and  $\Delta$ CLS1+4 (**Fig.6b**). Therefore, CLS2, CLS3 and CLS4 all promote INPP5E binding to  
379 ARL13B.

### 380 INPP5E binding to TULP3 is promoted by CLS2 and CLS3

381 TULP3 is a ciliary trafficking adapter needed for ciliary targeting of membrane proteins such as G  
382 protein-coupled receptors, polycystins, ARL13B and INPP5E<sup>34,61-63,82-84</sup>. However, whether INPP5E  
383 and TULP3 interact is not known. We therefore tested this. Indeed, EGFP-INPP5E specifically co-  
384 IPed TULP3-myc (**Fig.7a**). Such co-IP was unaffected by  $\Delta$ CLS1,  $\Delta$ CLS4 and  $\Delta$ CLS1+4, but was  
385 clearly reduced by  $\Delta$ CLS2 and  $\Delta$ CLS3 (**Fig.7a**). Consistently, TULP3 interacted strongly with EGFP-  
386 INPP5E(251-644), and much less so with EGFP-INPP5E(1-283) (**Fig.7a**).

387 TULP3 functions as an adapter by connecting the IFT trafficking machinery (which it binds via its N-  
388 terminal domain, NTD: aa 1-183) to membrane proteins (which it binds via its phosphoinositide-  
389 binding C-terminal Tubby domain, CTD: aa 184-442)<sup>62</sup>. To test how TULP3 binds INPP5E, we  
390 assessed co-IP of Flag-INPP5E by different EGFP-TULP3 constructs (**Fig.7b**). Flag-INPP5E  
391 specifically co-IPed with full length TULP3, an interaction that was largely dependent on TULP3's  
392 CTD, even though weak binding to NTD was also observed (**Fig.7b**). In addition, we tested Flag-  
393 INPP5E binding to two TULP3 mutants, namely K268A+R270A and K389A. The former cannot bind  
394 phosphoinositides, and may also be hypoacetylated<sup>62,85</sup>, whereas the latter removes a key lysine needed  
395 for TULP3 to interact with ARL13B and target it to cilia, according to a recent preprint<sup>64</sup>. Interestingly,  
396 both mutations clearly reduced INPP5E binding, though none abolished it completely (**Fig.7b**).  
397 Therefore, our data show that INPP5E interacts with TULP3, and that this interaction is dependent on:

## Multiple CLSs Target INPP5E to Cilia

398 (i) CLS2 and CLS3 in INPP5E's catalytic domain, and (ii) TULP3's Tubby domain and its ability to  
399 bind ARL13B and phosphoinositides (**Fig.7c**).

### 400 **INPP5E-CEP164 interaction is downregulated by CLS2-3**

401 INPP5E also interacts with CEP164, a ciliary base protein essential for ciliogenesis. In CEP164-  
402 silenced non-ciliated cells, INPP5E fails to accumulate at the centrosome <sup>18</sup>. This suggests that  
403 CEP164, by recruiting INPP5E to the ciliary base, may contribute to its ciliary targeting. Because of  
404 this, we also examined the INPP5E-CEP164 interaction. To do this, we looked at how EGFP-INPP5E  
405 and its mutants co-IP endogenous CEP164 in HEK293T cells. Interestingly, while WT,  $\Delta$ CLS1,  
406  $\Delta$ CLS4 and  $\Delta$ CLS1+4 all co-IPed similar amounts of CEP164, the  $\Delta$ CLS2 and  $\Delta$ CLS3 mutants  
407 displayed a stronger interaction, suggesting that CLS2 and CLS3 downregulate CEP164 binding  
408 (**Fig.8a**). Moreover, CEP164 strongly interacted with INPP5E's N-terminal fragment (1-283), but not  
409 with the CLS2/3-containing C-terminal one (251-644) (**Fig.8a**). Since much more CEP164 was pulled  
410 down by EGFP-INPP5E(1-283) than EGFP-INPP5E(WT), despite both fusion proteins being  
411 expressed similarly, this further indicates that CLS2-3 antagonize CEP164 binding, which is mediated  
412 by INPP5E's N-terminal region (**Fig.8a**).

413 CEP164 contains a WW domain near its N-terminus and several coiled coils in the rest of its long  
414 sequence (1460 aa) <sup>65-67</sup>. Since WW domains, like SH3 domains, interact with proline-rich ligands, we  
415 hypothesized that CEP164's WW might interact with INPP5E's proline-rich N-terminus <sup>86</sup>. To test  
416 this, we first checked whether Flag-INPP5E was co-IPed by three CEP164 fragments spanning its N-  
417 terminal (NT, aa 1-467), middle (Mid, aa 468-1135) and C-terminal (CT, aa 1136-1460) regions <sup>65</sup>.  
418 Consistent with our hypothesis, CEP164(NT)-EGFP strongly interacted with Flag-INPP5E, as did full  
419 length CEP164-EGFP (**Fig.8b**). Instead, no interaction was seen with CEP164(Mid)-EGFP and only a  
420 very weak one with CEP164(CT)-EGFP. Moreover, a mutation disrupting CEP164's WW domain  
421 (WWmut: Y74A+Y75A) abolished INPP5E binding to CEP164(NT)-EGFP (**Fig.8b**) <sup>65</sup>. Hence,  
422 CEP164's NT is sufficient for INPP5E binding, and CEP164's WW domain is required for it.

423 Altogether, these data suggest a model of CLS2-3 action: presumably, excessively strong binding to  
424 CEP164 would retain INPP5E at the ciliary base and prevent its translocation into the ciliary  
425 compartment. CLS2-3 might overcome this by loosening the CEP164-INPP5E interaction. If this is the  
426 main reason why CLS2-3 are required for INPP5E ciliary targeting, then deletion of the CEP164-  
427 interacting N-terminal region should rescue ciliary targeting of INPP5E- $\Delta$ CLS2 and INPP5E- $\Delta$ CLS3,

## Multiple CLSs Target INPP5E to Cilia

428 as CLS2-3 would no longer be needed for CEP164 dissociation. To test this, we combined the  $\Delta$ CLS2  
429 and  $\Delta$ CLS3 mutations with the  $\Delta$ 1-273 deletion, thereby generating the 274-644( $\Delta$ CLS2) and 274-  
430 644( $\Delta$ CLS3) mutants. Unlike the 274-644 control, which readily accumulated in cilia, both 274-  
431 644( $\Delta$ CLS2) and 274-644( $\Delta$ CLS3) completely failed to accumulate in cilia, just as the single  $\Delta$ CLS2  
432 and  $\Delta$ CLS3 mutants (**Fig.8c**). Hence, even though CLS2-3 promote CEP164 dissociation, this is not  
433 sufficient for INPP5E ciliary targeting (**Fig.8d**). This might be due to CLS2-3 being required for  
434 binding to other ciliary trafficking proteins, such as TULP3 (**Fig.7**).

### 435 **CSNK2A1 regulates INPP5E ciliary targeting without detectable physical interaction**

436 INPP5E prevents ectopic ciliogenesis by regulating how CEP164 interacts with TTBK2, a key  
437 ciliogenic kinase<sup>39</sup>. TTBK2 was recently found to be regulated by casein kinase 2 (CSNK2A1), so we  
438 wondered whether CSNK2A1 also regulates INPP5E and, more specifically, its ciliary targeting<sup>87</sup>. To  
439 test this, we examined INPP5E localization in ciliated control and *Csnk2a1*-null mouse embryonic  
440 fibroblasts. Interestingly, INPP5E ciliary levels were significantly reduced in absence of CSNK2A1  
441 (**Fig.S6a-b**). We then performed co-IP experiments to check if CSNK2A1-myc and EGFP-INPP5E  
442 physically interact. However, we detected no such interaction, suggesting that CSNK2A1 regulates  
443 INPP5E indirectly, or through interactions too labile to detect in this manner (**Fig.S6c**).

### 444 **INPP5E-ATG16L1 interaction is modulated by CLS1 and CLS4**

445 Recent work shows that INPP5E ciliary targeting requires ATG16L1, an autophagy protein that forms  
446 a complex with IFT-B complex component IFT20<sup>68,88</sup>. Moreover, ATG16L1 was shown to interact  
447 with INPP5E, and with its product PI4P<sup>68</sup>. We therefore assessed the CLS-dependence of the  
448 ATG16L1-INPP5E interaction. Interestingly, although the single  $\Delta$ CLS1,  $\Delta$ CLS2,  $\Delta$ CLS3 and  $\Delta$ CLS4  
449 mutants did not noticeably alter binding between EGFP-INPP5E and Flag-ATG16L1, a reduction was  
450 observed with the  $\Delta$ CLS1+4 mutant, suggesting that CLS1 and CLS4 may cooperate in ATG16L1  
451 binding, thus mirroring their cooperation in INPP5E ciliary targeting (**Fig.9a**). Consistent with CLS1  
452 and CLS4 partaking in the interaction, the C-terminal INPP5E fragment (251-644, containing both  
453 CLS1 and CLS4) was sufficient for binding, whereas the N-terminal fragment (1-283, containing only  
454 CLS1) interacted only weakly (**Fig.9a**). These data suggest that CLS1 and CLS4 may jointly be  
455 implicated in how ATG16L1 targets INPP5E to cilia (**Fig.9b**). On the other hand, CLS2 and CLS3  
456 would act via CEP164, TULP3 and ARL13B, with the latter also acting via CLS4, like PDE6D and  
457 RPGR (**Fig.9b**).

## Multiple CLSs Target INPP5E to Cilia

### 458 INPP5E immune synapse targeting is CLS-independent

459 Most cell types form primary cilia when their centrosomes are not engaged in cell division. The main  
460 exception to this is the hematopoietic lineage, where the centrosome is often engaged in other  
461 specialized structures, such as the immune synapse (IS) in lymphocytes<sup>89</sup>. Interestingly, numerous  
462 parallels exist between primary cilia and the IS, such as the use of IFT trafficking machinery<sup>89,90</sup>.  
463 ARL13B and ARL3 were shown to localize to the IS, and a recent preprint has shown that INPP5E  
464 does as well<sup>91-93</sup>. With advice from the preprint authors, we confirmed that endogenous INPP5E  
465 accumulates at the IS between Jurkat T-cells and Raji antigen-presenting cells, a well-established IS  
466 model (**Fig.S7a-b**)<sup>93-96</sup>. Given the parallels between cilia and IS, we wondered whether IS targeting of  
467 INPP5E shares the same mechanisms that INPP5E uses for ciliary targeting in other cell types. To test  
468 this, we assessed the CLS-dependence of INPP5E IS targeting. As also reported in the preprint, EGFP-  
469 INPP5E(WT) is also detected at the Jurkat-Raji IS (**Fig.S7c**)<sup>93</sup>. This localization was not noticeably  
470 perturbed in the  $\Delta$ CLS1,  $\Delta$ CLS2,  $\Delta$ CLS3,  $\Delta$ CLS4 or  $\Delta$ CLS1+4 mutants (**Fig.S7c**). Therefore, INPP5E  
471 IS targeting does not follow the same mechanisms as INPP5E ciliary targeting.

### 472 DISCUSSION

473 In this work, we have gained many important insights into INPP5E ciliary targeting mechanisms,  
474 including among others: (i) catalytic domain integrity is essential for ciliary targeting (**Fig.1**); (ii) the  
475 FDRxLYL motif (CLS3), also essential, is part of the catalytic domain fold (**Fig.1-2**); (iii) W383  
476 (CLS2), a solvent-exposed catalytic domain residue physically adjacent to CLS3, is specifically  
477 required for ciliary targeting (**Figs.2, S2-S3**); (iv) although optimal ciliary targeting requires both  
478 LLxPIR motif (CLS1) and CaaX box (CLS4), their partially redundant functions explain why none is  
479 essential for ciliary accumulation (**Fig.3**); (v) CLS1-4 are all highly conserved in vertebrates (**Fig.4**);  
480 (vi) some but not all JBTS-causative INPP5E mutations interfere with ciliary targeting (**Fig.4**); (vii)  
481 CLS4 is required for INPP5E interaction with PDE6D, ARL13B and RPGR (**Figs.5-6, S5**); (viii) CLS2  
482 and CLS3 promote INPP5E binding to TULP3 via its Tubby domain (**Fig.7**); (ix) CLS2 and CLS3  
483 downregulate binding between INPP5E and CEP164 N-termini, but this is not sufficient for ciliary  
484 targeting (**Fig.8**); (x) INPP5E ciliary targeting is regulated by CSNK2A1, with no detectable binding  
485 between them (**Fig.S6**); (xi) INPP5E binding to ATG16L1 is reduced by concomitant mutation of  
486 CLS1 and CLS4, but not by the single mutations (**Fig.9**); and (xii) INPP5E IS targeting is CLS-  
487 independent (**Fig.S7**). For a summary of how each CLS affects binding to PDE6D, RPGR, ARL13B,  
488 TULP3, CEP164 and ATG16L1, see **Table 1**.



## Multiple CLSs Target INPP5E to Cilia

489 Since catalytic domain integrity is essential for ciliary localization, it is important to distinguish  
490 whether candidate CLS residues act specifically, engaging ciliary trafficking machinery, rather than  
491 non-specifically, preserving domain structure. By using enzyme activity as a readout for catalytic  
492 domain integrity, we demonstrated that all four CLSs act specifically, since: (i) simultaneous deletion  
493 of both CLS1 and CLS4 had no effect on catalysis (**Fig.S4**); and (ii) although deleting CLS2 or CLS3  
494 reduced activity by about 2-fold, this is insufficient to explain the virtually complete loss of ciliary  
495 targeting observed with these mutants (**Fig.2**).

496 Further supporting this conclusion are the following considerations: (i) an equivalent 2-fold reduction  
497 was also observed with R379A, yet this mutant was readily observed in cilia, even though R379 is  
498 directly adjacent to CLS2-3 in the folded catalytic domain (**Fig.2**); (ii) the same applies to the JBTS  
499 mutant R345S, whose activity is also 2-fold lower than WT (**Fig.4** and data not shown); (iii) as shown  
500 by the cycloheximide chase assays, over 50% of the  $\Delta$ CLS2 and  $\Delta$ CLS3 proteins have a long half-life,  
501 similar to WT, suggesting that these mutations only interfere with catalytic domain integrity, and hence  
502 stability, in less than half of the protein population (**Fig.S2**); (iv) W383 mutation to alanine, valine,  
503 leucine, isoleucine and methionine all led to a modest reduction in activity, yet a complete loss of  
504 ciliary targeting (**Fig.S3**); and (v) CLS2 and CLS3 specifically affect binding to some but not all  
505 INPP5E interactors (**Fig.5-9**). Therefore, we conclude that CLS1-4 are all *bona fide* CLSs.

506 Although mutations in other JBTS genes are known to disrupt INPP5E ciliary localization, mutations  
507 in *INPP5E* itself had not been reported to do so <sup>3,5,13-20</sup>. Instead, INPP5E mutations were shown to  
508 impair INPP5E enzyme activity, without affecting ciliary targeting <sup>8,29</sup>. Here, we show for the first time  
509 that *INPP5E* gene mutations do sometimes prevent ciliary accumulation. Curiously, the mutations  
510 causing such mistargeting were not the ones located near CLS2-3, but rather mutations that likely  
511 compromise catalytic domain integrity (**Fig.4**). Still, how G286R, V303M and W474R disrupt ciliary  
512 targeting has not been addressed empirically. Interestingly, both G286R and W474R are homozygous  
513 mutations, suggesting a complete lack of INPP5E in the cilia of these patients. Whether and how this  
514 contributed to JBTS manifestations in these patients, as compared to patients with activity-impaired  
515 INPP5E in their cilia, remains an open question.

516 Besides discovering two novel CLSs in INPP5E (CLS1-2), we also shed light into how these novel  
517 CLSs relate to the previously identified ones (CLS3-4). For instance, we unexpectedly found that CLS1  
518 and CLS4, despite being far apart from each other, cooperatively promote ciliary targeting. Although

## Multiple CLSs Target INPP5E to Cilia

519 single CLS1 and CLS4 mutants show moderately impaired cilia localization, it is only in the double  
520 mutant that ciliary targeting is completely abolished (**Fig.3a-c**). This indicates a partial functional  
521 redundancy that begs for an explanation. Although the mechanism of CLS4 action is fairly well  
522 understood, how CLS1 can partially substitute for it remains unclear <sup>17,50,51</sup>. In this regard, we tested  
523 several hypotheses. First, we hypothesized that CLS1, like CLS4, might also promote interaction with  
524 PDE6D, but the answer was clearly negative (**Fig.5, Fig.9b**). We then wondered whether CLS1 might  
525 act via RPGR, a prenylated INPP5E and PDE6D-interacting protein also needed for INPP5E ciliary  
526 targeting <sup>54-59,97</sup>. Again, however, we found that CLS4 but not CLS1 mediates INPP5E-RPGR binding  
527 (**Fig.S5, Fig.9b**). ARL13B and ARL3 promote dissociation of the PDE6D-INPP5E complex inside  
528 cilia. Nevertheless, ARL3 does not interact with INPP5E <sup>18</sup> (**data not shown**), whereas ARL13B  
529 binding also depends on CLS4 but not CLS1 (**Fig.6, Fig.9b**). For TULP3 and CEP164, neither CLS1  
530 nor CLS4 had any effect on the interactions (**Figs.7-8, Fig.9b**).

531 We also looked at ATG16L1, an autophagy protein without which INPP5E cannot accumulate in cilia  
532 <sup>68</sup>. As previously reported, we detected INPP5E-ATG16L1 binding, which was reduced with  $\Delta$ CLS1+4  
533 but not  $\Delta$ CLS1 or  $\Delta$ CLS4 (**Fig.9a**). This mirrors the effects of CLS1 and CLS4 on ciliary targeting,  
534 suggesting that ATG16L1 may exert its effects via these CLSs (**Fig.9b**). Since ATG16L1 is involved  
535 in the Golgi exit of IFT20, an IFT-B component that traffics from Golgi to cilia base, one could  
536 speculate that ATG16L1 also promotes INPP5E Golgi exit <sup>68</sup>. This would be in accordance with  
537 previous reports of INPP5E Golgi localization, and with post-prenylation processing of CaaX box  
538 proteins occurring on the ER-Golgi surface <sup>11,79</sup>. However, how ATG16L1 promotes INPP5E ciliary  
539 accumulation, and to what extent ATG16L1 binding explains the combined CLS1+CLS4 effects  
540 remains unknown.

541 Besides the functional CLS1-CLS4 connection, we also uncovered a CLS2-CLS3 link. Given their  
542 steric proximity (**Fig.2b**), we hypothesize CLS2 and CLS3 work together as a functional unit to recruit  
543 ciliary trafficking proteins like ARL13B and TULP3 (**Figs.6-7, Fig.9b**). Consistent with this, CLS2  
544 and CLS3 behaved largely equivalently in all our interaction experiments (**Figs.5-9**). Moreover, the  
545 need to keep CLS2-3 together also explains why a folded catalytic domain is critical for ciliary  
546 targeting (**Fig.1**). Future structural studies should further clarify these issues.

547 ARL13B regulates INPP5E ciliary targeting in at least two ways: (i) by directly interacting with  
548 INPP5E in a CLS3-dependent manner; and (ii) by functioning as an ARL3-GEF, thereby promoting  
549 INPP5E release from PDE6D inside cilia <sup>17,18,48-50</sup>. However, of these two regulatory modes, only the

## Multiple CLSs Target INPP5E to Cilia

550 direct interaction is essential for ARL13B to mediate INPP5E ciliary retention<sup>48,49</sup>. Our ARL13B-  
551 INPP5E interaction experiments showed that CLS2, CLS3 and CLS4 all affect their association (**Fig.6**).  
552 Given that CLS2-3 likely form a functional unit as mentioned above, CLS2 probably affects the direct  
553 ARL13B-INPP5E interaction, as previously reported for CLS3<sup>18</sup>. CLS4 mutation has also been shown  
554 recently to moderately reduce ARL13B binding<sup>48</sup>. A possible explanation is that, by mediating  
555 INPP5E membrane insertion, farnesylation facilitates access to ARL13B, a fatty acylated protein<sup>98,99</sup>.

556 TULP3 is essential for ciliary targeting of both ARL13B and INPP5E, among other ciliary membrane  
557 proteins<sup>61,64</sup>. Through its C-terminal Tubby domain, TULP3 directly interacts with ARL13B, targeting  
558 it to cilia, which in turn allows INPP5E ciliary targeting<sup>64</sup>. However, whether TULP3 and INPP5E  
559 interact with each other had not been reported. Using co-IPs in HEK293T cells, we show that this is  
560 indeed the case, with the interaction depending on CLS2 and CLS3 (**Fig.7a**). On TULP3's side, the  
561 interaction mostly depends on the Tubby domain, with a minor contribution from the NTD (**Fig.7b**).  
562 Moreover, Tubby domain mutations K389A and K268A+R270A also reduced binding, more so with  
563 K389A (**Fig.7b**). The K268A+R270A mutation interferes with TULP3's ability to bind  
564 phosphoinositides and target GPCRs and other transmembrane proteins to cilia, but has no effect on  
565 TULP3's ability to target ARL13B and INPP5E to cilia<sup>64</sup>. Thus, K268 and R270, despite moderately  
566 affecting TULP3-INPP5E binding, do not seem to play an important role in INPP5E ciliary  
567 accumulation. On the other hand, K389 is important for ARL13B binding and critical for its ciliary  
568 targeting and that of INPP5E<sup>64</sup>. This suggests that the TULP3-INPP5E interaction may be mediated  
569 by ARL13B. Consistently, the K389-dependent TULP3-ARL13B interaction is known to be direct,  
570 whereas the TULP3-INPP5E interaction in our co-IPs could well be indirect<sup>64</sup>. As a counterargument,  
571 if INPP5E can only bind TULP3 indirectly via ARL13B, then it is hard to explain why mutation of  
572 CLS4 reduces INPP5E-ARL13B but not INPP5E-TULP3 binding (**Figs.6-7**). Clearly more  
573 experiments are needed to clarify these points.

574 CEP164 binds INPP5E and recruits it to the ciliary base<sup>18</sup>. Herein, we show that this interaction  
575 involves the N-termini of both proteins, with the WW domain in CEP164 being critical (**Fig.8a-b**).  
576 Since WW domains typically interact with proline-rich motifs, which abound in INPP5E's N-terminal  
577 region, it seems very likely that the CEP164-INPP5E interaction also involves these motifs<sup>86</sup>. In  
578 addition to defining this core interaction, we also provide evidence that this interaction is negatively  
579 regulated by CLS2-3 in INPP5E's catalytic domain (**Fig.8a**). This is an interesting observation, as the  
580 CEP164-INPP5E interaction may need to be loosened for INPP5E to efficiently enter cilia. Such

## Multiple CLSs Target INPP5E to Cilia

581 loosening, however, cannot be the main function of CLS2-3, as they were still required for ciliary  
582 targeting of INPP5E mutants unable to bind CEP164 (**Fig.8c**).

583 Tau tubulin kinase 2 (TTBK2) is an essential ciliogenic kinase that, like INPP5E, binds CEP164's WW  
584 domain via a proline-rich region <sup>65,100</sup>. Thus, INPP5E and TTBK2 may compete for CEP164 binding.  
585 Moreover, INPP5E's product PI4P binds both CEP164 and TTBK2, blocking their interaction <sup>39</sup>. These  
586 mechanisms help explain why INPP5E antagonizes ectopic ciliogenesis in non-ciliated cells <sup>39</sup>. On the  
587 other hand, these mechanisms suggest that INPP5E targeting and function may be regulated by TTBK2.  
588 Given that TTBK2-null cells fail to form cilia, we assessed this possibility in another model: in cells  
589 lacking the casein kinase CSNK2A1, a recently reported upstream regulator of TTBK2 <sup>87</sup>. Indeed,  
590 CSNK2A1-KO cells displayed reduced ciliary INPP5E levels (**Fig.S6a**). However, since CSNK2A1  
591 has multiple substrates, whether this effect is TTBK2-dependent remains uncertain. We also looked  
592 for a CSNK2A1-INPP5E interaction but found none, suggesting CSNK2A1's effects on INPP5E are  
593 indirect or mediated by interactions that are too weak or transient for us to detect (**Fig.S6c**).

594 Finally, given the known parallels between primary cilia and immune synapses, with the latter  
595 containing, among other ciliary proteins, ARL13B and INPP5E, we asked whether CLS1-4 also drive  
596 INPP5E targeting to the IS <sup>92,93</sup>. The answer was no, pointing to clearly distinct mechanisms for  
597 targeting to both structures (**Fig.S7**). This may mean that INPP5E targeting to cilia and IS evolved  
598 independently of each other or, alternatively, that a common evolutionary origin has been blurred by a  
599 long history of evolutionary divergence. The fact that INPP5E IS targeting is quickly induced upon  
600 assembly of the highly plastic and dynamic IS also suggests a more transient role for INPP5E at the  
601 IS, as opposed to its more constitutive ciliary localization. A deeper knowledge of how INPP5E is  
602 targeted and functions at these signaling platforms, cilia and IS, will be needed to answer these  
603 questions.

604 Altogether, our data show that INPP5E ciliary targeting is a surprisingly complex process involving  
605 four different cis-acting sequences (CLS1-4), and multiple trans-acting factors (like PDE6D, RPGR,  
606 ARL13B, TULP3, CEP164 and ATG16L1). This level of complexity is unusual, especially when  
607 compared to other ciliary cargoes, whose targeting is more straightforward, typically involving a single  
608 CLS <sup>1,70-73</sup>. The complexity and redundancy in INPP5E ciliary targeting suggest this is a very important  
609 process, subject to fine regulation. This is consistent with the surprisingly wide range of functions  
610 INPP5E plays at the cilium, controlling among others their lipid and protein composition, assembly  
611 and disassembly, exovesicle release, and signaling <sup>7,8,12,32-45</sup>. By providing a much broader view of the

## Multiple CLSs Target INPP5E to Cilia

612 mechanisms involved in INPP5E ciliary targeting, the stage is now set for a deeper molecular  
613 understanding of these processes and their regulation.

### 614 **METHODS**

#### 615 **Antibodies and reagents**

616 Mouse monoclonal antibodies: anti-acetylated  $\alpha$ -tubulin (AcTub) (Sigma, T7451, clone 6-11B-1, IF:  
617 1:10,000), anti- $\alpha$ -tubulin (Proteintech, 66031-1-Ig, WB: 1:1000), anti-EGFP (Proteintech, 50430-2-  
618 AP, WB: 1:1000), anti-ARL13B (Proteintech, 66739-1-Ig, WB: 1:1000), anti-Flag (Sigma, F3165,  
619 clone M2, WB: 1:2000). Rabbit polyclonal antibodies: anti-EGFP (Proteintech, 50403-2-AP, IF: 1:200,  
620 WB: 1:1000), anti-RPGR (Proteintech, 16891-1-AP, WB: 1:1000), anti-TULP3 (Proteintech, 13637-  
621 1-AP, WB: 1:2000), anti-CEP164 (Proteintech, 22227-1-AP, WB: 1:1000), anti-ATG16L (MBL,  
622 PM040, WB: 1:1000), anti-Myc (Proteintech, 16286-1-AP, WB: 1:1000), and anti-INPP5E  
623 (Proteintech, 17797-1-AP, IF: 1:100). Goat polyclonal antibody: anti- $\gamma$ -tubulin ( $\gamma$ -Tub) (Santa Cruz,  
624 sc-7396, IF: 1:200). AlexaFluor (AF)-conjugated donkey secondary antibodies for IF (from  
625 Thermofisher, used at 1:10,000): AF488 anti-rabbit IgG (A21206), AF555 anti-mouse IgG (A31570)  
626 and AF647 anti-goat IgG (A21447). Also from Thermofisher were HRP-conjugated goat anti-  
627 mouse/rabbit IgG secondary antibodies for WB (all at 62ng/ml) and AF546 Phalloidin (A22283), used  
628 at 1:100. For IP assays, GFP-Trap\_MA beads (Chromotek, gtma-20) were used. For phosphatase  
629 assays, PtdIns(4,5)P<sub>2</sub>-diC8 (P-4508) and Malachite Green Assay Kit (K-1500) were from Echelon  
630 Biosciences (Tebu-Bio), while n-octyl- $\beta$ -D-glucopyranoside was from Alfa Aesar (J67390.03).

#### 631 **Plasmids and mutagenesis**

632 Plasmids encoding human INPP5E-WT and D477N in the pEGFP-C1 backbone (pEGFP-INPP5E-WT  
633 and D477N) were reported previously <sup>7,32</sup>. All other EGFP-INPP5E mutants were created by site-  
634 directed mutagenesis using overlap extension PCR (or single-step PCR where possible) to amplify the  
635 mutagenized ORFs and clone them into pEGFP-C1 using XhoI-KpnI sites. Amplifications were  
636 performed with Platinum SuperFi DNA polymerase (Thermofisher), and all finished constructs were  
637 validated by DNA sequencing (Eurofins Genomics). To obtain pFlag-INPP5E, the INPP5E ORF was  
638 cloned into the EcoRI-KpnI sites of pFlag-CMV4 vector. To generate pFlag-PDE6D, human PDE6D  
639 ORF was amplified with primers encoding N-terminal Flag, and Flag-PDE6D was then used to replace  
640 the AgeI-EcoRI-flanked mVenus-PDE6D ORF in the mVenus-PDE6D plasmid described below.

## Multiple CLSs Target INPP5E to Cilia

641 Plasmid pcDNA3.1(+)-N-DYK-RPGR, expressing Flag-tagged human RPGR (NM\_000328.3), was  
642 purchased from GenScript. To generate pEGFP-TULP3(K389A), overlap extension PCR was used to  
643 obtain the mutant ORF, which was then cloned KpnI-BamHI into pEGFP-C1. All other TULP3-  
644 expressing plasmids were described elsewhere <sup>101</sup>. CEP164-EGFP was from Addgene (#41149), and  
645 was mutagenized to obtain the NT, NT-WWmut, Mid and CT versions <sup>65</sup>. To generate pFlag-  
646 ATG16L1, EcoRI insert from pMRX-IP-SECFP-hATG16A1 (Addgene #58994) was transferred to  
647 pFlagCMV4. FKBP ORF was cloned into p-mCherry-C1 to obtain mCherry-FKBP, into which  
648 INPP5E and its mutants were subcloned. mVenus-PDE6D and ARL13B-EYFP were obtained by  
649 inserting the human ORFs into p-mVenus-C1 and pEYFP-N1, respectively. FRB-CFP-CaaX box is  
650 described elsewhere <sup>102</sup>.

### 651 Cell culture and transfections

652 All cell lines were grown at 37 °C and 5% CO<sub>2</sub> in a humidified atmosphere and were regularly tested  
653 to ensure they were mycoplasma-free. hTERT-RPE1 cells were cultured in DMEM/F12 basal medium  
654 supplemented with 10% fetal bovine serum (FBS) and were reverse transfected using JetPrime  
655 (Polyplus-transfection), and their cilia analyzed 48 hours later, after 24 hours of serum starvation.  
656 HEK293T cells were maintained in DMEM+10% FBS, transfected using the calcium phosphate  
657 method, and lysed 40-48 hours later. HeLa cells were cultured in DMEM+10%  
658 FBS+Penicillin/Streptomycin and transfected using FuGENE 6 (Promega). Co-recruitment assays  
659 were performed 24 hours after transfection. CRISPR-engineered control and *Csnk2a1*-null mouse  
660 embryonic fibroblasts have been described elsewhere <sup>87</sup>. Raji B and Jurkat T (clone JE6.1) cell lines  
661 from ATCC were cultured in RPMI-1640 medium containing L-glutamine, penicillin/streptomycin,  
662 and 10% heat-inactivated FBS.

### 663 Immunofluorescence microscopy

664 hTERT-RPE1 cells grown to confluence on coverslips were fixed 5 min in PBS+4% paraformaldehyde  
665 (PFA) at room temperature (RT), followed by freezer-cold methanol for 3 min at -20°C. Cells were  
666 then blocked and permeabilized for 30-60 min at RT in PBS+0.1% Triton X100+2% donkey  
667 serum+0.02% sodium azide (blocking solution). Coverslips were then incubated in a humidified  
668 chamber for 2 hours at RT (or overnight, 4°C) with blocking solution-diluted primary antibodies. After  
669 three PBS washes, PBS-diluted secondary antibodies and DAPI (1 µg/ml, Thermofisher) were added  
670 for 1 hour at RT in the dark. After three more PBS washes, coverslips were mounted on slides using

## Multiple CLSs Target INPP5E to Cilia

671 Prolong Diamond (Thermofisher), incubated overnight at 4°C, and imaged with a Nikon Ti  
672 fluorescence microscope. Brightness and contrast of microscopic images were adjusted for optimal  
673 visualization using Adobe Photoshop or Fiji (Image J).

### 674 **Immunoprecipitation and Western blot**

675 HEK293T cells were lysed 40-48 hours post-transfection in buffer containing 50mM Tris-HCl pH=7.5,  
676 150mM NaCl, 1% Igepal CA-630 (Sigma-Aldrich) and 1X Halt protease inhibitor cocktail  
677 (Thermofisher, #78429). Lysates were then rotated (15 min, 4°C) and centrifuged (10 min, 20,000g,  
678 4°C), and protein levels in the postnuclear supernatants measured with Pierce BCA Protein Assay Kit  
679 (Thermofisher). After equalizing protein amount and concentration in all samples, EGFP fusion  
680 proteins were immunoprecipitated with GFP-Trap magnetic agarose (GFP-Trap\_MA, Chromotek)  
681 beads for 2 hours or overnight at 4°C with rotation. Beads were then washed thrice in lysis buffer  
682 without protease inhibitors, eluted with 2X Laemmli buffer containing 200mM DTT, and boiled 5 min  
683 at 95°C. SDS-PAGE and Western blots were performed as previously described <sup>101,103</sup>. For activity  
684 assays using immunoprecipitates of EGFP-INPP5E fusion proteins, see next section.

### 685 **Phosphoinositide phosphatase assays**

686 Activity assays were performed essentially as described <sup>8</sup>. Briefly, HEK293T cell lysates were obtained  
687 as above, and their protein levels measured with Pierce BCA Protein Assay kit (Thermofisher). EGFP-  
688 INPP5E or its mutants were then immunoprecipitated from 1 mg of cell lysate by overnight rotation at  
689 4°C with GFP-Trap\_MA beads (Chromotek). Beads were then washed thrice in buffer containing  
690 50mM Tris-HCl pH=7.5 and 150mM NaCl buffer (no protease inhibitors or detergent), and twice more  
691 in activity buffer (50mM Tris-HCl pH=7.5, 150mM NaCl, 3mM MgCl<sub>2</sub> and 0.1% octyl-β-D-  
692 glucopyranoside (Alfa Aesar)). For the activity assays, beads were incubated in activity buffer  
693 supplemented with 120 μM diC8-PtdIns(4,5)P<sub>2</sub>, from Echelon Biosciences. After incubating the  
694 enzyme reactions for 20 min at 37°C, the supernatant was retrieved from the beads and its phosphate  
695 concentration measured at 620 nm using the Malachite Green Assay Kit (Echelon Biosciences). Beads  
696 were then processed for Western blot as above.

### 697 **Co-recruitment assays**

698 Co-recruitment assays were performed using Eclipse Ti microscope (Nikon, Japan) with a 100X TIRF  
699 objective (1.0X zoom and 4X4 binning) in TIRF mode and PCO-Edge 4.2 BI sCMOS camera (PCO,

## Multiple CLSs Target INPP5E to Cilia

700 Germany), driven by NIS Elements software (Nikon) and equipped with 440 nm, 514 nm and 561 nm  
701 laser lines. Time lapse imaging was performed at 2 min intervals for 20 minutes, with 100 nM  
702 rapamycin addition after the fifth time point. All live cell imaging was conducted at 37°C, 5% CO<sub>2</sub> and  
703 90% humidity with a stage top incubation system (Tokai Hit). Vitamin and phenol red-free media (US  
704 Biological) supplemented with 2% FBS were used in imaging to reduce background and  
705 photobleaching. Adequate co-expression of all relevant plasmids was confirmed by fluorescent  
706 imaging at appropriate wavelengths. To minimize variability due to relative expression levels, only  
707 cells showing at least 30% increase in mCherry intensity after addition of rapamycin were considered  
708 for quantification. All image processing and analyses for co-recruitment assays were performed using  
709 Metamorph (Molecular Devices, Sunnyvale, CA, USA) and FIJI software (NIH, Bethesda, MD, USA).

### 710 Immune synapse analyses

711 Raji cells were attached to glass-bottom microwell culture dishes (IBIDI) using poly-L-lysine (20  
712 µg/mL). Raji cells were then labeled with 10 µM CMAC (7-amino-4-chloromethylcoumarin,  
713 Molecular Probes), pulsed with 1 µg/ml SEE (Staphylococcus enterotoxin E, Toxin Technologies), and  
714 mixed with Jurkat T cells (clone JE6.1) (ATCC). To promote synaptic conjugate formation, cell-  
715 containing dishes were centrifuged at low speed (200xg, 30 seg) and incubated 5 min at 37°C. For  
716 recombinant protein expression, exponentially growing Jurkat T cells were electroporated with 20–30  
717 µg of plasmid as previously reported<sup>94</sup>, and Raji cells were added as above 40-48 hours post-  
718 electroporation. Cell conjugates were then fixed, first with PBS+2% PFA (10 min, RT), then with cold  
719 acetone (10 min at -20°C). Immunofluorescence staining was done as previously described<sup>94</sup>. Imaging  
720 was performed using a Nikon Eclipse TiE microscope equipped with a DS-Qi1MC digital camera, a  
721 PlanApo VC 60x NA 1.4 objective, and NIS-AR software (all from Nikon). Epifluorescence images  
722 were then deconvolved with Huygens Deconvolution Software from Scientific Volume Image (SVI),  
723 using the “widefield” optical option.

### 724 Structural analyses

725 Swiss PDB Viewer was used to visualize the crystallographic structure of INPP5E aa 282-623 (Protein  
726 Data Bank (PDB) ID: 2xsw) in order to identify candidate CLS or ciliopathy residues near the  
727 FDRxLYL motif<sup>75</sup>. Final figures were rendered using the PyMOL Molecular Graphics System  
728 (Version 2.0 Schrödinger), from either the PDB structure or the full length AlphaFold model (AF-  
729 Q9NRR6-F1)<sup>76</sup>.



## Multiple CLSs Target INPP5E to Cilia

### 730 **Statistical analyses**

731 Graphs and statistical analyses were created using GraphPad Prism 8 software. Activity assays were  
732 analyzed by one-way ANOVA, followed by Tukey's multiple comparisons tests. The corresponding  
733 figure legends contain the specific details of each experiment. Co-recruitment assay graphs show  
734 means  $\pm$  95% confidence interval with  $n \geq 40$  different cells pooled from at least three independent  
735 experiments.

### 736 **AUTHOR CONTRIBUTIONS**

737 DCR, RMM and FRGG conceived and designed the study. DCR and RMM performed most  
738 experiments. PBG, ADR, AL, MBSR and GH also performed experiments. DCR, RMM, PBG, ADR,  
739 AL, OP, SG, MR, MI, TI and FRGG conceptualized experiments and analyzed data. SG, MI, TI and  
740 FRGG supervised the work. FRGG wrote the manuscript, with input from all other authors. All authors  
741 read and agreed to the published version of the manuscript.

### 742 **ACKNOWLEDGEMENTS**

743 We thank Dr. Jung-Chi Liao for advice with INPP5E immune synapse stainings. This publication is  
744 part of grants PID2019-104941RB-I00 (to FRGG) and PID2020-114148RB-I00 (to MI), both funded  
745 by MCIN/AEI/ 10.13039/501100011033, and the latter also funded by ERDF, a way of making Europe.  
746 FRGG is also recipient of an ACCI-2020 grant from CIBERER. This work was also funded by  
747 American Heart Association fellowship 20POST35220046 (ADR), discretionary funds (TI),  
748 Community of Madrid contract PEJD-2016/BMD-2341 (MBSR), and MICINN predoctoral grant  
749 BES2016-077828 (RMM).

### 750 **CONFLICT OF INTEREST**

751 The authors declare that the research was conducted in the absence of any commercial or financial  
752 relationships that could be construed as a potential conflict of interest.

### 753 **SUPPLEMENTARY MATERIAL**

754 The Supplementary Material for this article includes Supplementary Figures S1-S7 and their legends.

### 755 **REFERENCES**

## Multiple CLSs Target INPP5E to Cilia

- 756 1 Nachury, M. V. & Mick, D. U. Establishing and regulating the composition of cilia for signal  
757 transduction. *Nat Rev Mol Cell Biol* **20**, 389-405, doi:10.1038/s41580-019-0116-4 (2019).
- 758 2 Reiter, J. F. & Leroux, M. R. Genes and molecular pathways underpinning ciliopathies. *Nat*  
759 *Rev Mol Cell Biol* **18**, 533-547, doi:10.1038/nrm.2017.60 (2017).
- 760 3 Garcia-Gonzalo, F. R. & Reiter, J. F. Open Sesame: How Transition Fibers and the Transition  
761 Zone Control Ciliary Composition. *Cold Spring Harb Perspect Biol* **9**,  
762 doi:10.1101/cshperspect.a028134 (2017).
- 763 4 Braun, D. A. & Hildebrandt, F. Ciliopathies. *Cold Spring Harb Perspect Biol* **9**,  
764 doi:10.1101/cshperspect.a028191 (2017).
- 765 5 Bachmann-Gagescu, R. *et al.* Healthcare recommendations for Joubert syndrome. *Am J Med*  
766 *Genet A* **182**, 229-249, doi:10.1002/ajmg.a.61399 (2020).
- 767 6 Bachmann-Gagescu, R. *et al.* Joubert syndrome: a model for untangling recessive disorders  
768 with extreme genetic heterogeneity. *J Med Genet* **52**, 514-522, doi:10.1136/jmedgenet-2015-  
769 103087 (2015).
- 770 7 Jacoby, M. *et al.* INPP5E mutations cause primary cilium signaling defects, ciliary instability  
771 and ciliopathies in human and mouse. *Nat Genet* **41**, 1027-1031, doi:10.1038/ng.427 (2009).
- 772 8 Bielas, S. L. *et al.* Mutations in INPP5E, encoding inositol polyphosphate-5-phosphatase E,  
773 link phosphatidyl inositol signaling to the ciliopathies. *Nat Genet* **41**, 1032-1036,  
774 doi:10.1038/ng.423 (2009).
- 775 9 Asano, T., Mochizuki, Y., Matsumoto, K., Takenawa, T. & Endo, T. Pharbin, a novel inositol  
776 polyphosphate 5-phosphatase, induces dendritic appearances in fibroblasts. *Biochem Biophys*  
777 *Res Commun* **261**, 188-195, doi:10.1006/bbrc.1999.0998 (1999).
- 778 10 Kisseleva, M. V., Wilson, M. P. & Majerus, P. W. The isolation and characterization of a cDNA  
779 encoding phospholipid-specific inositol polyphosphate 5-phosphatase. *J Biol Chem* **275**,  
780 20110-20116, doi:10.1074/jbc.M910119199 (2000).
- 781 11 Kong, A. M. *et al.* Cloning and characterization of a 72-kDa inositol-polyphosphate 5-  
782 phosphatase localized to the Golgi network. *J Biol Chem* **275**, 24052-24064,  
783 doi:10.1074/jbc.M000874200 (2000).
- 784 12 Guo, J. *et al.* Primary Cilia Signaling Promotes Axonal Tract Development and Is Disrupted in  
785 Joubert Syndrome-Related Disorders Models. *Dev Cell* **51**, 759-774 e755,  
786 doi:10.1016/j.devcel.2019.11.005 (2019).
- 787 13 Garcia-Gonzalo, F. R. *et al.* A transition zone complex regulates mammalian ciliogenesis and  
788 ciliary membrane composition. *Nat Genet* **43**, 776-784, doi:10.1038/ng.891 (2011).
- 789 14 Roberson, E. C. *et al.* TMEM231, mutated in orofacioidigital and Meckel syndromes, organizes  
790 the ciliary transition zone. *J Cell Biol* **209**, 129-142, doi:10.1083/jcb.201411087 (2015).
- 791 15 Slaats, G. G. *et al.* MKS1 regulates ciliary INPP5E levels in Joubert syndrome. *J Med Genet*  
792 **53**, 62-72, doi:10.1136/jmedgenet-2015-103250 (2016).
- 793 16 Alkanderi, S. *et al.* ARL3 Mutations Cause Joubert Syndrome by Disrupting Ciliary Protein  
794 Composition. *Am J Hum Genet* **103**, 612-620, doi:10.1016/j.ajhg.2018.08.015 (2018).
- 795 17 Thomas, S. *et al.* A homozygous PDE6D mutation in Joubert syndrome impairs targeting of  
796 farnesylated INPP5E protein to the primary cilium. *Hum Mutat* **35**, 137-146,  
797 doi:10.1002/humu.22470 (2014).

## Multiple CLSs Target INPP5E to Cilia

- 798 18 Humbert, M. C. *et al.* ARL13B, PDE6D, and CEP164 form a functional network for INPP5E  
799 ciliary targeting. *Proc Natl Acad Sci U S A* **109**, 19691-19696, doi:10.1073/pnas.1210916109  
800 (2012).
- 801 19 Ning, K. *et al.* Defective INPP5E distribution in NPHP1-related Senior-Loken syndrome. *Mol*  
802 *Genet Genomic Med* **9**, e1566, doi:10.1002/mgg3.1566 (2021).
- 803 20 Dowdle, W. E. *et al.* Disruption of a ciliary B9 protein complex causes Meckel syndrome. *Am*  
804 *J Hum Genet* **89**, 94-110, doi:10.1016/j.ajhg.2011.06.003 (2011).
- 805 21 Latour, B. L. *et al.* Dysfunction of the ciliary ARMC9/TOGARAM1 protein module causes  
806 Joubert syndrome. *J Clin Invest* **130**, 4423-4439, doi:10.1172/JCI131656 (2020).
- 807 22 Dafinger, C. *et al.* Mutations in KIF7 link Joubert syndrome with Sonic Hedgehog signaling  
808 and microtubule dynamics. *J Clin Invest* **121**, 2662-2667, doi:10.1172/JCI43639 (2011).
- 809 23 De Mori, R. *et al.* Hypomorphic Recessive Variants in SUFU Impair the Sonic Hedgehog  
810 Pathway and Cause Joubert Syndrome with Cranio-facial and Skeletal Defects. *Am J Hum*  
811 *Genet* **101**, 552-563, doi:10.1016/j.ajhg.2017.08.017 (2017).
- 812 24 Van De Weghe, J. C. *et al.* Mutations in ARMC9, which Encodes a Basal Body Protein, Cause  
813 Joubert Syndrome in Humans and Ciliopathy Phenotypes in Zebrafish. *Am J Hum Genet* **101**,  
814 23-36, doi:10.1016/j.ajhg.2017.05.010 (2017).
- 815 25 Frikstad, K. M. *et al.* A CEP104-CSPP1 Complex Is Required for Formation of Primary Cilia  
816 Competent in Hedgehog Signaling. *Cell Rep* **28**, 1907-1922 e1906,  
817 doi:10.1016/j.celrep.2019.07.025 (2019).
- 818 26 Ki, S. M. *et al.* CEP41-mediated ciliary tubulin glutamylation drives angiogenesis through  
819 AURKA-dependent deciliation. *EMBO Rep* **21**, e48290, doi:10.15252/embr.201948290  
820 (2020).
- 821 27 Lee, J. E. *et al.* CEP41 is mutated in Joubert syndrome and is required for tubulin glutamylation  
822 at the cilium. *Nat Genet* **44**, 193-199, doi:10.1038/ng.1078 (2012).
- 823 28 Travaglini, L. *et al.* Phenotypic spectrum and prevalence of INPP5E mutations in Joubert  
824 syndrome and related disorders. *Eur J Hum Genet* **21**, 1074-1078, doi:10.1038/ejhg.2012.305  
825 (2013).
- 826 29 de Goede, C. *et al.* Role of reverse phenotyping in interpretation of next generation sequencing  
827 data and a review of INPP5E related disorders. *Eur J Paediatr Neurol* **20**, 286-295,  
828 doi:10.1016/j.ejpn.2015.11.012 (2016).
- 829 30 Xu, Y. *et al.* Mutation analysis in 129 genes associated with other forms of retinal dystrophy in  
830 157 families with retinitis pigmentosa based on exome sequencing. *Mol Vis* **21**, 477-486 (2015).
- 831 31 Wang, X. *et al.* Comprehensive molecular diagnosis of 179 Leber congenital amaurosis and  
832 juvenile retinitis pigmentosa patients by targeted next generation sequencing. *J Med Genet* **50**,  
833 674-688, doi:10.1136/jmedgenet-2013-101558 (2013).
- 834 32 Garcia-Gonzalo, F. R. *et al.* Phosphoinositides Regulate Ciliary Protein Trafficking to  
835 Modulate Hedgehog Signaling. *Dev Cell* **34**, 400-409, doi:10.1016/j.devcel.2015.08.001  
836 (2015).

## Multiple CLSs Target INPP5E to Cilia

- 837 33 Chavez, M. *et al.* Modulation of Ciliary Phosphoinositide Content Regulates Trafficking and  
838 Sonic Hedgehog Signaling Output. *Dev Cell* **34**, 338-350, doi:10.1016/j.devcel.2015.06.016  
839 (2015).
- 840 34 Badgandi, H. B., Hwang, S. H., Shimada, I. S., Lorient, E. & Mukhopadhyay, S. Tubby family  
841 proteins are adapters for ciliary trafficking of integral membrane proteins. *J Cell Biol* **216**, 743-  
842 760, doi:10.1083/jcb.201607095 (2017).
- 843 35 Dyson, J. M. *et al.* INPP5E regulates phosphoinositide-dependent cilia transition zone function.  
844 *J Cell Biol* **216**, 247-263, doi:10.1083/jcb.201511055 (2017).
- 845 36 Phua, S. C. *et al.* Dynamic Remodeling of Membrane Composition Drives Cell Cycle through  
846 Primary Cilia Excision. *Cell* **168**, 264-279 e215, doi:10.1016/j.cell.2016.12.032 (2017).
- 847 37 Wang, F., Ijuin, T., Itoh, T. & Takenawa, T. Regulation of IGF-1/PI3K/Akt signalling by the  
848 phosphoinositide phosphatase parbin. *J Biochem* **150**, 83-93, doi:10.1093/jb/mvr037 (2011).
- 849 38 Hakim, S. *et al.* Inpp5e suppresses polycystic kidney disease via inhibition of PI3K/Akt-  
850 dependent mTORC1 signaling. *Hum Mol Genet* **25**, 2295-2313, doi:10.1093/hmg/ddw097  
851 (2016).
- 852 39 Xu, Q. *et al.* Phosphatidylinositol phosphate kinase PIPKIgamma and phosphatase INPP5E  
853 coordinate initiation of ciliogenesis. *Nat Commun* **7**, 10777, doi:10.1038/ncomms10777  
854 (2016).
- 855 40 Xu, W. *et al.* The Joubert Syndrome Protein Inpp5e Controls Ciliogenesis by Regulating  
856 Phosphoinositides at the Apical Membrane. *J Am Soc Nephrol* **28**, 118-129,  
857 doi:10.1681/ASN.2015080906 (2017).
- 858 41 Constable, S., Long, A. B., Floyd, K. A., Schurmans, S. & Caspary, T. The ciliary  
859 phosphatidylinositol phosphatase Inpp5e plays positive and negative regulatory roles in Shh  
860 signaling. *Development* **147**, doi:10.1242/dev.183301 (2020).
- 861 42 Hasenpusch-Theil, K. *et al.* A transient role of the ciliary gene Inpp5e in controlling direct  
862 versus indirect neurogenesis in cortical development. *Elife* **9**, doi:10.7554/eLife.58162 (2020).
- 863 43 Sharif, A. S. *et al.* Deletion of the phosphatase INPP5E in the murine retina impairs  
864 photoreceptor axoneme formation and prevents disc morphogenesis. *J Biol Chem* **296**, 100529,  
865 doi:10.1016/j.jbc.2021.100529 (2021).
- 866 44 Ukhanov, K. *et al.* INPP5E controls ciliary localization of phospholipids and the odor response  
867 in olfactory sensory neurons. *J Cell Sci* **135**, doi:10.1242/jcs.258364 (2022).
- 868 45 Yue, H. *et al.* Down-Regulation of Inpp5e Associated With Abnormal Ciliogenesis During  
869 Embryonic Neurodevelopment Under Inositol Deficiency. *Front Neurol* **12**, 579998,  
870 doi:10.3389/fneur.2021.579998 (2021).
- 871 46 Hasegawa, J. *et al.* Autophagosome-lysosome fusion in neurons requires INPP5E, a protein  
872 associated with Joubert syndrome. *EMBO J* **35**, 1853-1867, doi:10.15252/embj.201593148  
873 (2016).
- 874 47 Kosling, S. K., Fansa, E. K., Maffini, S. & Wittinghofer, A. Mechanism and dynamics of  
875 INPP5E transport into and inside the ciliary compartment. *Biol Chem* **399**, 277-292,  
876 doi:10.1515/hsz-2017-0226 (2018).
- 877 48 Fujisawa, S. *et al.* ARL3 and ARL13B GTPases participate in distinct steps of INPP5E  
878 targeting to the ciliary membrane. *Biol Open* **10**, doi:10.1242/bio.058843 (2021).

## Multiple CLSs Target INPP5E to Cilia

- 879 49 Qiu, H., Fujisawa, S., Nozaki, S., Katoh, Y. & Nakayama, K. Interaction of INPP5E with  
880 ARL13B is essential for its ciliary membrane retention but dispensable for its ciliary entry. *Biol*  
881 *Open* **10**, doi:10.1242/bio.057653 (2021).
- 882 50 Gotthardt, K. *et al.* A G-protein activation cascade from Arl13B to Arl3 and implications for  
883 ciliary targeting of lipidated proteins. *Elife* **4**, doi:10.7554/eLife.11859 (2015).
- 884 51 Fansa, E. K., Kosling, S. K., Zent, E., Wittinghofer, A. & Ismail, S. PDE6delta-mediated  
885 sorting of INPP5E into the cilium is determined by cargo-carrier affinity. *Nat Commun* **7**,  
886 11366, doi:10.1038/ncomms11366 (2016).
- 887 52 Ivanova, A. A. *et al.* Biochemical characterization of purified mammalian ARL13B protein  
888 indicates that it is an atypical GTPase and ARL3 guanine nucleotide exchange factor (GEF). *J*  
889 *Biol Chem* **292**, 11091-11108, doi:10.1074/jbc.M117.784025 (2017).
- 890 53 ElMaghloob, Y. *et al.* ARL3 activation requires the co-GEF BART and effector-mediated  
891 turnover. *Elife* **10**, doi:10.7554/eLife.64624 (2021).
- 892 54 Zhang, Q. *et al.* Disruption of RPGR protein interaction network is the common feature of  
893 RPGR missense variations that cause XLRP. *Proc Natl Acad Sci U S A* **116**, 1353-1360,  
894 doi:10.1073/pnas.1817639116 (2019).
- 895 55 Rao, K. N., Zhang, W., Li, L., Anand, M. & Khanna, H. Prenylated retinal ciliopathy protein  
896 RPGR interacts with PDE6delta and regulates ciliary localization of Joubert syndrome-  
897 associated protein INPP5E. *Hum Mol Genet* **25**, 4533-4545, doi:10.1093/hmg/ddw281 (2016).
- 898 56 Dutta, N. & Seo, S. RPGR, a prenylated retinal ciliopathy protein, is targeted to cilia in a  
899 prenylation- and PDE6D-dependent manner. *Biol Open* **5**, 1283-1289, doi:10.1242/bio.020461  
900 (2016).
- 901 57 Lee, J. J. & Seo, S. PDE6D binds to the C-terminus of RPGR in a prenylation-dependent  
902 manner. *EMBO Rep* **16**, 1581-1582, doi:10.15252/embr.201541220 (2015).
- 903 58 Fansa, E. K., O'Reilly, N. J., Ismail, S. & Wittinghofer, A. The N- and C-terminal ends of  
904 RPGR can bind to PDE6delta. *EMBO Rep* **16**, 1583-1585, doi:10.15252/embr.201541404  
905 (2015).
- 906 59 Watzlich, D. *et al.* The interplay between RPGR, PDEdelta and Arl2/3 regulate the ciliary  
907 targeting of farnesylated cargo. *EMBO Rep* **14**, 465-472, doi:10.1038/embo.2013.37 (2013).
- 908 60 Vossing, C. *et al.* The Major Ciliary Isoforms of RPGR Build Different Interaction Complexes  
909 with INPP5E and RPGRIP1L. *Int J Mol Sci* **22**, doi:10.3390/ijms22073583 (2021).
- 910 61 Han, S. *et al.* TULP3 is required for localization of membrane-associated proteins ARL13B  
911 and INPP5E to primary cilia. *Biochem Biophys Res Commun* **509**, 227-234,  
912 doi:10.1016/j.bbrc.2018.12.109 (2019).
- 913 62 Mukhopadhyay, S. *et al.* TULP3 bridges the IFT-A complex and membrane phosphoinositides  
914 to promote trafficking of G protein-coupled receptors into primary cilia. *Genes Dev* **24**, 2180-  
915 2193, doi:10.1101/gad.1966210 (2010).
- 916 63 Mukhopadhyay, S. *et al.* The ciliary G-protein-coupled receptor Gpr161 negatively regulates  
917 the Sonic hedgehog pathway via cAMP signaling. *Cell* **152**, 210-223,  
918 doi:10.1016/j.cell.2012.12.026 (2013).

## Multiple CLSs Target INPP5E to Cilia

- 919 64 Palicharla, V. R. *et al.* Interactions between TULP3 tubby domain cargo site and ARL13B  
920 amphipathic helix promote lipidated protein transport to cilia. *Biorxiv*,  
921 doi:10.1101/2021.05.25.445488v2 (2021).
- 922 65 Cajanek, L. & Nigg, E. A. Cep164 triggers ciliogenesis by recruiting Tau tubulin kinase 2 to  
923 the mother centriole. *Proc Natl Acad Sci U S A* **111**, E2841-2850,  
924 doi:10.1073/pnas.1401777111 (2014).
- 925 66 Schmidt, K. N. *et al.* Cep164 mediates vesicular docking to the mother centriole during early  
926 steps of ciliogenesis. *J Cell Biol* **199**, 1083-1101, doi:10.1083/jcb.201202126 (2012).
- 927 67 Graser, S. *et al.* Cep164, a novel centriole appendage protein required for primary cilium  
928 formation. *J Cell Biol* **179**, 321-330, doi:10.1083/jcb.200707181 (2007).
- 929 68 Boukhalfa, A., Roccio, F., Dupont, N., Codogno, P. & Morel, E. The autophagy protein  
930 ATG16L1 cooperates with IFT20 and INPP5E to regulate the turnover of phosphoinositides at  
931 the primary cilium. *Cell Rep* **35**, 109045, doi:10.1016/j.celrep.2021.109045 (2021).
- 932 69 Pampliega, O. *et al.* Functional interaction between autophagy and ciliogenesis. *Nature* **502**,  
933 194-200, doi:10.1038/nature12639 (2013).
- 934 70 Garcia-Gonzalo, F. R. & Reiter, J. F. Scoring a backstage pass: mechanisms of ciliogenesis and  
935 ciliary access. *J Cell Biol* **197**, 697-709, doi:10.1083/jcb.201111146 (2012).
- 936 71 Barbeito, P. & Garcia-Gonzalo, F. R. HTR6 and SSTR3 targeting to primary cilia. *Biochem*  
937 *Soc Trans* **49**, 79-91, doi:10.1042/BST20191005 (2021).
- 938 72 Mukhopadhyay, S. *et al.* Trafficking to the primary cilium membrane. *Mol Biol Cell* **28**, 233-  
939 239, doi:10.1091/mbc.E16-07-0505 (2017).
- 940 73 McIntyre, J. C., Hege, M. M. & Berbari, N. F. Trafficking of ciliary G protein-coupled  
941 receptors. *Methods Cell Biol* **132**, 35-54, doi:10.1016/bs.mcb.2015.11.009 (2016).
- 942 74 Blum, M. *et al.* The InterPro protein families and domains database: 20 years on. *Nucleic Acids*  
943 *Res* **49**, D344-D354, doi:10.1093/nar/gkaa977 (2021).
- 944 75 Tresaugues, L., Schutz, P., Arrowsmith, C.H., Berglund, H., Bountra, C., Collins, R., Edwards,  
945 A.M., Flodin, S., Flores, A., Graslund, S., Hammarstrom, M., Johansson, I., Karlberg, T., Kol,  
946 S., Kotenyova, T., Kouznetsova, E., Moche, M., Nyman, T., Persson, C., Schuler, H., Siponen,  
947 M.I., Thorsell, A.G., Van Der Berg, S., Wahlberg, E., Weigelt, J., Welin, M., Nordlund, P.  
948 Crystal structure of human INPP5E Crystal structure of human INPP5E. *Protein Data Bank*  
949 **PDB ID: 2xsw**, doi:10.2210/pdb2XSW/pdb (2010).
- 950 76 Jumper, J. *et al.* Highly accurate protein structure prediction with AlphaFold. *Nature* **596**, 583-  
951 589, doi:10.1038/s41586-021-03819-2 (2021).
- 952 77 Kong, A. M. *et al.* Phosphatidylinositol 3-phosphate [PtdIns3P] is generated at the plasma  
953 membrane by an inositol polyphosphate 5-phosphatase: endogenous PtdIns3P can promote  
954 GLUT4 translocation to the plasma membrane. *Mol Cell Biol* **26**, 6065-6081,  
955 doi:10.1128/MCB.00203-06 (2006).
- 956 78 Whisstock, J. C. *et al.* The inositol polyphosphate 5-phosphatases and the apurinic/aprimidinic  
957 base excision repair endonucleases share a common mechanism for catalysis. *J Biol Chem* **275**,  
958 37055-37061, doi:10.1074/jbc.M006244200 (2000).

## Multiple CLSs Target INPP5E to Cilia

- 959 79 Wright, L. P. & Philips, M. R. Thematic review series: lipid posttranslational modifications.  
960 CAAX modification and membrane targeting of Ras. *J Lipid Res* **47**, 883-891,  
961 doi:10.1194/jlr.R600004-JLR200 (2006).
- 962 80 Lin, Y. C. *et al.* Chemically inducible diffusion trap at cilia reveals molecular sieve-like barrier.  
963 *Nat Chem Biol* **9**, 437-443, doi:10.1038/nchembio.1252 (2013).
- 964 81 Gallego, O. *et al.* Detection and characterization of protein interactions in vivo by a simple live-  
965 cell imaging method. *PLoS One* **8**, e62195, doi:10.1371/journal.pone.0062195 (2013).
- 966 82 Legue, E. & Liem, K. F., Jr. Tulp3 Is a Ciliary Trafficking Gene that Regulates Polycystic  
967 Kidney Disease. *Curr Biol* **29**, 803-812 e805, doi:10.1016/j.cub.2019.01.054 (2019).
- 968 83 Hilgendorf, K. I. *et al.* Omega-3 Fatty Acids Activate Ciliary FFAR4 to Control Adipogenesis.  
969 *Cell* **179**, 1289-1305 e1221, doi:10.1016/j.cell.2019.11.005 (2019).
- 970 84 Hwang, S. H. *et al.* Tulp3 Regulates Renal Cystogenesis by Trafficking of Cystoproteins to  
971 Cilia. *Curr Biol* **29**, 790-802 e795, doi:10.1016/j.cub.2019.01.047 (2019).
- 972 85 Kerek, E. M. *et al.* A conserved acetylation switch enables pharmacological control of tubby-  
973 like protein stability. *J Biol Chem*, doi:10.1074/jbc.RA120.015839 (2020).
- 974 86 Macias, M. J., Wiesner, S. & Sudol, M. WW and SH3 domains, two different scaffolds to  
975 recognize proline-rich ligands. *FEBS Lett* **513**, 30-37, doi:10.1016/s0014-5793(01)03290-2  
976 (2002).
- 977 87 Loukil, A., Barrington, C. & Goetz, S. C. A complex of distal appendage-associated kinases  
978 linked to human disease regulates ciliary trafficking and stability. *Proc Natl Acad Sci U S A*  
979 **118**, doi:10.1073/pnas.2018740118 (2021).
- 980 88 Finetti, F. *et al.* The Intraflagellar Transport Protein IFT20 Recruits ATG16L1 to Early  
981 Endosomes to Promote Autophagosome Formation in T Cells. *Front Cell Dev Biol* **9**, 634003,  
982 doi:10.3389/fcell.2021.634003 (2021).
- 983 89 Stinchcombe, J. C. & Griffiths, G. M. Communication, the centrosome and the immunological  
984 synapse. *Philos Trans R Soc Lond B Biol Sci* **369**, doi:10.1098/rstb.2013.0463 (2014).
- 985 90 Finetti, F., Onnis, A. & Baldari, C. T. Regulation of vesicular traffic at the T cell immune  
986 synapse: lessons from the primary cilium. *Traffic* **16**, 241-249, doi:10.1111/tra.12241 (2015).
- 987 91 Powell, L., Samarakoon, Y. H., Ismail, S. & Sayer, J. A. ARL3, a small GTPase with a  
988 functionally conserved role in primary cilia and immune synapses. *Small GTPases* **12**, 167-  
989 176, doi:10.1080/21541248.2019.1703466 (2021).
- 990 92 Stephen, L. A. *et al.* The Ciliary Machinery Is Repurposed for T Cell Immune Synapse  
991 Trafficking of LCK. *Dev Cell* **47**, 122-132 e124, doi:10.1016/j.devcel.2018.08.012 (2018).
- 992 93 Chiu, T. Y. *et al.* INPP5E regulates CD3 $\zeta$  enrichment at the immune synapse by  
993 phosphoinositide distribution control. *Biorxiv*, doi:10.1101/2021.01.06.425541 (2021).
- 994 94 Herranz, G. *et al.* Protein Kinase C delta Regulates the Depletion of Actin at the Immunological  
995 Synapse Required for Polarized Exosome Secretion by T Cells. *Front Immunol* **10**, 851,  
996 doi:10.3389/fimmu.2019.00851 (2019).
- 997 95 Montoya, M. C. *et al.* Role of ICAM-3 in the initial interaction of T lymphocytes and APCs.  
998 *Nat Immunol* **3**, 159-168, doi:10.1038/ni753 (2002).

## Multiple CLSs Target INPP5E to Cilia

- 999 96 Calvo, V. & Izquierdo, M. Role of Actin Cytoskeleton Reorganization in Polarized Secretory  
1000 Traffic at the Immunological Synapse. *Front Cell Dev Biol* **9**, 629097,  
1001 doi:10.3389/fcell.2021.629097 (2021).
- 1002 97 Khanna, H. More Than Meets the Eye: Current Understanding of RPGR Function. *Adv Exp*  
1003 *Med Biol* **1074**, 521-538, doi:10.1007/978-3-319-75402-4\_64 (2018).
- 1004 98 Cevik, S. *et al.* Active transport and diffusion barriers restrict Joubert Syndrome-associated  
1005 ARL13B/ARL-13 to an Inv-like ciliary membrane subdomain. *PLoS Genet* **9**, e1003977,  
1006 doi:10.1371/journal.pgen.1003977 (2013).
- 1007 99 Roy, K. *et al.* Palmitoylation of the ciliary GTPase ARL13b is necessary for its stability and its  
1008 role in cilia formation. *J Biol Chem* **292**, 17703-17717, doi:10.1074/jbc.M117.792937 (2017).
- 1009 100 Oda, T., Chiba, S., Nagai, T. & Mizuno, K. Binding to Cep164, but not EB1, is essential for  
1010 centriolar localization of TTBK2 and its function in ciliogenesis. *Genes Cells* **19**, 927-940,  
1011 doi:10.1111/gtc.12191 (2014).
- 1012 101 Barbeito, P. *et al.* HTR6 and SSTR3 ciliary targeting relies on both IC3 loops and C-terminal  
1013 tails. *Life Sci Alliance* **4**, doi:10.26508/lsa.202000746 (2021).
- 1014 102 Deb Roy, A. *et al.* A phospho-regulated signal motif determines subcellular localization of  $\alpha$ -  
1015 TAT1 for dynamic microtubule acetylation. *Biorxiv* **10.1101/2020.09.23.310235** (2021).
- 1016 103 Martin-Hurtado, A. *et al.* NRF2-dependent gene expression promotes ciliogenesis and  
1017 Hedgehog signaling. *Sci Rep* **9**, 13896, doi:10.1038/s41598-019-50356-0 (2019).

1018

1019

### 1020 FIGURE LEGENDS

1021 **Figure 1. INPP5E catalytic domain encompasses FDRxLYL motif and is required for ciliary**  
1022 **targeting. (a)** Top diagram represents full length human INPP5E protein sequence (aa 1-644).  
1023 Depicted are the proline-rich region (aa 10-242, Uniprot), the previously reported ciliary localization  
1024 signal (FDRxLYL, aa 609-615<sup>18</sup>), and the CaaX box driving farnesylation (aa 641-644). Also shown  
1025 is the inositol polyphosphate 5-phosphatase catalytic domain, whose most conserved core corresponds  
1026 to InterPro domain IPR000300 (aa 297-599), but which actually spans aa 282-623, as revealed by its  
1027 crystal structure, available at the Protein Data Bank (PDB) and displayed below (PDB ID: 2xsw).  
1028 Notice how FDRxLYL residues (in magenta above and below) are part of the catalytic domain, on  
1029 whose surface they fold. The 3D structure also shows active site residues in cyan, alpha-helices in  
1030 orange, and beta-strands in yellow (including the beta-sandwich at the domain's core, and a small beta-  
1031 hairpin near the active site). **(b)** Schematic representation of full length human INPP5E (1-644) and its  
1032 deletion mutants used in this figure, indicating on the right which ones localize to cilia. **(c)**  
1033 Representative immunofluorescence images of cilia from hTERT-RPE1 cells transfected with the



## Multiple CLSs Target INPP5E to Cilia

1034 indicated EGFP-INPP5E constructs. Cells were stained with antibodies against acetylated  $\alpha$ -tubulin  
1035 (AcTub),  $\gamma$ -tubulin ( $\gamma$ Tub) and EGFP to detect the fusion proteins. Scale bar, 5  $\mu$ m.

1036 **Figure 2. W383 and FDRxLYL motifs act as CLSs on the catalytic domain surface. (a)** Cilia  
1037 localization of the indicated FDRxLYL mutants of EGFP-INPP5E was analyzed in hTERT-RPE1 cells  
1038 as in Figure 1. Scale bars, 5  $\mu$ m. **(b)** Magnification from INPP5E structure (PDB ID: 2xsw) showing  
1039 the FDRxLYL motif residues (pink) and adjacent catalytic domain residues shown here to affect ciliary  
1040 targeting (green). Distance between W383 and F609 is indicated in angstroms. Beta-sheets and alpha-  
1041 helices are shown as yellow and orange ribbons, respectively. Notice active site region on top left  
1042 (cyan). **(c)** Cilia localization of the indicated EGFP-INPP5E constructs was analyzed as in (a). Scale  
1043 bars, 5  $\mu$ m. **(d)** Percentage of positive cilia was quantitated for each of the indicated constructs. Data  
1044 are mean $\pm$ SEM of n=3 independent experiments. Data were analyzed by one-way ANOVA followed  
1045 by Tukey's multiple comparisons tests. Significance relative to WT is shown as p<0.0001(\*\*\*\*).  
1046 LYL>AAA: L613A+Y614A+L615A; FDR>AAA: F609A+D610A+R611A; RR>AA:  
1047 R378A+R379A. **(e)** 5-phosphatase activity, expressed as picomoles of released inorganic phosphate  
1048 per minute, was measured, using PI(4,5)P<sub>2</sub> as substrate, in immunoprecipitates of HEK293T cells  
1049 transfected with the indicated EGFP-INPP5E variants. Cilia-localized constructs shown as black  
1050 columns, non-ciliary as grey. Data are mean $\pm$ SEM of n=9,9,5,4,3,5,3,3,2,3,3 independent experiments  
1051 (from left to right). Data were analyzed by one-way ANOVA followed by Tukey's multiple  
1052 comparisons tests. Significance relative to WT is shown as small asterisks directly above each bar.  
1053 Significance relative to W383A is shown as bigger asterisks as indicated. In all cases, significance is  
1054 represented as: p<0.05(\*), p<0.01(\*\*), p<0.001(\*\*\*), p<0.0001(\*\*\*\*), or n.s. (not significant). **(f)**  
1055 Protein levels in the immunoprecipitates used for the activity assays in (e). Western blot bands were  
1056 quantitated and plotted as percentage of WT. Data are mean $\pm$ SEM of n=8,5,3,3,5,2,3,3,2,3 independent  
1057 experiments (from left to right). One-way ANOVA revealed no significant differences.

1058 **Figure 3. The LLxPIR motif is a novel CLS that cooperates with the CaaX box to mediate**  
1059 **INPP5E ciliary targeting. (a)** Schema of full length human INPP5E and its mutants used in (b-c).  
1060 Cilia localization of each mutant is indicated on the right. **(b)** Cilia localization of WT and indicated  
1061 mutants was analyzed in hTERT-RPE1 cells as in Figures 1-2. Scale bar, 5 $\mu$ m. **(c)** Quantitation of data  
1062 from (b). The percentage of positive cilia in transfected cells is shown for the indicated EGFP-INPP5E  
1063 constructs as mean $\pm$ SEM of n=3 independent experiments. Data were analyzed by one-way ANOVA  
1064 with post-hoc Tukey multiple comparisons tests. Statistical significance is depicted as p<0.01(\*\*),

## Multiple CLSs Target INPP5E to Cilia

1065  $p < 0.001$ (\*\*\*) or  $p < 0.0001$ (\*\*\*\*). Significance is shown relative to  $\Delta 251-273 + C641S$  unless otherwise  
1066 indicated. **(d)** Schema of INPP5E deletion mutants used to map the CLS within aa 251-273. None of  
1067 these mutants contains the CaaX box (aa 641-644), so their ciliary targeting is strictly dependent on  
1068 residues 251-273. Cilia localization of each mutant is indicated on the right. **(e)** Cilia localization of  
1069 the mutants from (d) was analyzed in hTERT-RPE1 cells as in Figures 1-3. **(f)** Sequence of aa 257-268  
1070 in wild type INPP5E and indicated mutants, whose ciliary localization is shown on the right. **(g)** Ciliary  
1071 targeting of INPP5E(257-626) containing the mutations from (f) was analyzed as above. Scale bars,  
1072 5  $\mu\text{m}$ .

1073 **Figure 4. A subset of Joubert syndrome INPP5E mutations abolishes ciliary targeting.** **(a)** CLS1-  
1074 4 are highly evolutionarily conserved in vertebrates, including human (NP\_063945.2), mouse  
1075 (AAH80295.1), python (XP\_007441606.1), crow (XP\_039417670.1), toad (XP\_002935265.1), and  
1076 zebrafish (NP\_001096089.2). Consensus sequences are shown below. **(b)** AlphaFold model of INPP5E  
1077 3D structure (AF-Q9NRR6-F1) depicting predicted locations of CLS1 (red), CLS2 (green), CLS3  
1078 (pink) and CLS4 (yellow). Active site in cyan. Beta-strands and alpha-helices in yellow and brown,  
1079 respectively. Proline-rich N-terminal region (aa 1-200), predicted to be highly flexible, is not shown.  
1080 **(c)** Table of INPP5E ciliopathy mutations analyzed here. JBTS: Joubert syndrome; LCA: Leber  
1081 congenital amaurosis; hom: homozygous; comp het: compound heterozygous. **(d)** Schema of INPP5E  
1082 protein sequence indicating the locations of the ciliopathy mutations from (c) relative to its four CLSs,  
1083 its catalytic domain (cyan) and its N-terminal proline-rich region (green). **(e)** Ciliary localization of  
1084 mutants from (c-d) was analyzed in hTERT-RPE1 cells as in Figures 1-3. Scale bar, 5  $\mu\text{m}$ . (f-h) 3D  
1085 views of INPP5E catalytic domain (PDB ID: 2xsw) showing the ciliopathy-mutated residues from (c)  
1086 in dark blue (other colors as in (b)). **(f)** full catalytic domain showing G286 (bottom) and D490 (top  
1087 left). **(g)** closeup view of beta-sandwich showing W474 and V303. **(h)** closeup view of CLS2-3 region  
1088 showing R345, T355, R378, C385, V388L and R621.

1089 **Figure 5. CLS4 promotes INPP5E binding to PDE6D.** **(a)** The indicated EGFP-INPP5E variants  
1090 were coexpressed in HEK293T cells with Flag-PDE6D, as indicated. Lysates were immunoprecipitated  
1091 with GFP-Trap beads and analyzed by Western blot with the indicated antibodies. **(b)** Schema of  
1092 chemically-inducible co-recruitment assay. Rapamycin (Rapa)-induced interaction between FKBP and  
1093 FRB is used to quantitate binding of prey candidates to a bait. FKBP is fused to the prey along with a  
1094 fluorescent protein, while FRB is tethered to inner leaflet of plasma membrane. Upon rapamycin  
1095 addition, FKBP binds to FRB, bringing bait (red FP) and associated prey (green FP) to the plasma

## Multiple CLSs Target INPP5E to Cilia

1096 membrane. **(c)** Recruitment of bait and prey to plasma membrane can be sensitively detected by TIRF  
1097 microscopy as an increased fluorescence signal. The ratio of final to initial TIRF intensity upon  
1098 rapamycin addition ( $I/I_0$ ) for the prey provides a quantitative measure of prey's co-recruitment to  
1099 plasma membrane by bait, and hence of the prey-bait interaction. **(d)** TIRF microscopy images showing  
1100 rapamycin-induced plasma membrane recruitment of bait constructs (left) and the corresponding co-  
1101 recruitment of prey (mVenus-PDE6D, right). Intensity scales are depicted at bottom. Scale bar, 10mm.  
1102 **(e)** Normalized rapamycin-induced co-recruitment of mVenus-PDE6D (prey) by mCherry-FKBP-  
1103 INPP5E (WT or indicated mutants), or by mCherry-FKBP (mCherry) as negative control. Individual  
1104 measurements of  $n>50$  cells per condition are shown. Box and whisker plots represent median, first  
1105 and third quartiles, and 95% confidence intervals. Statistical significance relative to WT is shown as  
1106 \*\*\*  $p<0.001$  (unpaired Student's t-tests).

1107 **Figure 6. CLS2, CLS3 and CLS4 promote INPP5E binding to ARL13B.** **(a)**  
1108 Coimmunoprecipitation of endogenous ARL13B with the indicated EGFP-INPP5E constructs in  
1109 HEK293T cells. Asterisk points to EGFP-INPP5E(1-283) band. **(b)** Normalized rapamycin-induced  
1110 co-recruitment of ARL13B-EYFP (prey) by mCherry-FKBP-INPP5E (WT or indicated mutants), or  
1111 by mCherry-FKBP (mCherry) as negative control. Individual measurements of  $n>50$  cells per  
1112 condition are shown. Box and whisker plots represent median, first and third quartiles, and 95%  
1113 confidence intervals. Statistical significance relative to WT is shown as \*\*\*  $p<0.001$  (unpaired  
1114 Student's t-tests).

1115 **Figure 7. CLS2 and CLS3 promote INPP5E binding to TULP3.** **(a)** The indicated EGFP-INPP5E  
1116 variants were coexpressed in HEK293T cells with TULP3-myc as indicated. Lysates were  
1117 immunoprecipitated with GFP-Trap beads and analyzed by Western blot with the indicated antibodies.  
1118 **(b)** The indicated EGFP-TULP3 variants were coexpressed in HEK293T cells with Flag-INPP5E as  
1119 indicated. Lysates were immunoprecipitated with GFP-Trap beads and analyzed by Western blot with  
1120 the indicated antibodies. NTD: N-terminal domain (aa 1-183); CTD: C-terminal Tubby domain (aa  
1121 184-442). **(c)** Schema of INPP5E-TULP3 interaction. On INPP5E's side, the interaction mostly  
1122 involves the catalytic domain, requiring CLS2 and CLS3. On TULP3's side, the interaction occurs  
1123 mostly through the CTD and is affected by the ARL13B-binding K389, and by the phosphoinositide  
1124 (PIPs)-binding K268 and R270.

## Multiple CLSs Target INPP5E to Cilia

1125 **Figure 8. CLS2 and CLS3 antagonize INPP5E binding to CEP164 but this is not sufficient for**  
1126 **ciliary targeting. (a)** Lysates of HEK293T cells expressing the indicated EGFP-INPP5E variants were  
1127 immunoprecipitated with GFP-Trap beads and the levels of endogenous CEP164 and exogenous EGFP  
1128 were analyzed by Western blot as indicated. Molecular weight markers on the right. **(b)** Flag-INPP5E  
1129 was coexpressed in HEK293T cells with the indicated CEP164-EGFP variants, including full length  
1130 CEP164 (aa 1-1460), its N-terminal (NT, 1-467), middle (Mid, 468-1135) and C-terminal (CT, 1136-  
1131 1460) regions, and NT carrying a mutated WW domain (WW: aa 56-89; mutation: Y74A+Y75A).  
1132 Lysates were immunoprecipitated with GFP-Trap beads and analyzed by Western blot with antibodies  
1133 against Flag or EGFP, as indicated. Molecular weight markers are displayed on the right. **(c)** CLS2 and  
1134 CLS3 are still required for INPP5E ciliary targeting in mutants unable to bind CEP164. Cilia  
1135 localization was analyzed as in previous figures for the indicated EGFP-INPP5E variants, all of which  
1136 lack aa 1-273 and hence cannot bind CEP164. Scale bar, 5  $\mu$ m. **(d)** Schema summarizing results from  
1137 (a-b). CEP164-NT is sufficient for INPP5E binding provided the WW domain is intact. On INPP5E's  
1138 side, the proline-rich N-terminal region (aa 1-283) is sufficient to interact with CEP164. Moreover,  
1139 INPP5E(1-283), INPP5E( $\Delta$ CLS2) and INPP5E( $\Delta$ CLS3) mutants all bind CEP164 more intensely than  
1140 INPP5E(WT), indicating that INPP5E's C-terminal region downregulates CEP164 binding in a  
1141 CLS2/3-dependent manner. This may or may not be necessary for INPP5E ciliary targeting, but it is  
1142 clearly not sufficient, as shown by the data in (c).

1143 **Figure 9. CLS1 and CLS4 modulate the ATG16L1-INPP5E interaction. (a)** The indicated EGFP-  
1144 INPP5E variants were coexpressed in HEK293T cells with Flag-ATG16L1 as indicated. Lysates were  
1145 immunoprecipitated with GFP-Trap beads and analyzed by Western blot with the indicated antibodies.  
1146 **(b)** Schema of INPP5E structure depicting CLS1-4 and the proteins through which they regulate  
1147 INPP5E ciliary targeting, as shown herein.

1148

## 1149 TABLES

1150 **Table 1. CLS-dependence of INPP5E protein-protein interactions.** Cilia localization and the  
1151 indicated interactions are shown for each EGFP-INPP5E construct on the left column. For both  
1152 localization and interactions, meaning of arrows is as follows: two upward green arrows (strong), one  
1153 upward green arrow (moderate), one downward red arrow (low), and two downward red arrows  
1154 (undetectable).

## Multiple CLSs Target INPP5E to Cilia

| INPP5E construct | Ciliary? | INPP5E interactors |      |        |       |        |         |
|------------------|----------|--------------------|------|--------|-------|--------|---------|
|                  |          | PDE6D              | RPGR | ARL13B | TULP3 | CEP164 | ATG16L1 |
| WT               | ↑↑       | ↑                  | ↑    | ↑      | ↑     | ↑      | ↑       |
| ΔCLS1            | ↑        | ↑                  | ↑    | ↑      | ↑     | ↑      | ↑       |
| ΔCLS2            | ↓↓       | ↑                  | ↑    | ↓      | ↓     | ↑↑     | ↑       |
| ΔCLS3            | ↓↓       | ↑                  | ↑    | ↓      | ↓     | ↑↑     | ↑       |
| ΔCLS4            | ↑        | ↓↓                 | ↓↓   | ↓↓     | ↑     | ↑      | ↑       |
| ΔCLS1+4          | ↓↓       | ↓↓                 | ↓↓   | ↓↓     | ↑     | ↑      | ↓       |
| CT (251-644)     | ↑↑       | ↑                  | ↑    | ↑      | ↑     | ↓↓     | ↑       |
| NT (1-283)       | ↓↓       | ↓↓                 | ↓↓   | ↓↓     | ↓     | ↑↑     | ↓       |

1155

Figure 1. Cilleros-Rodriguez et al.

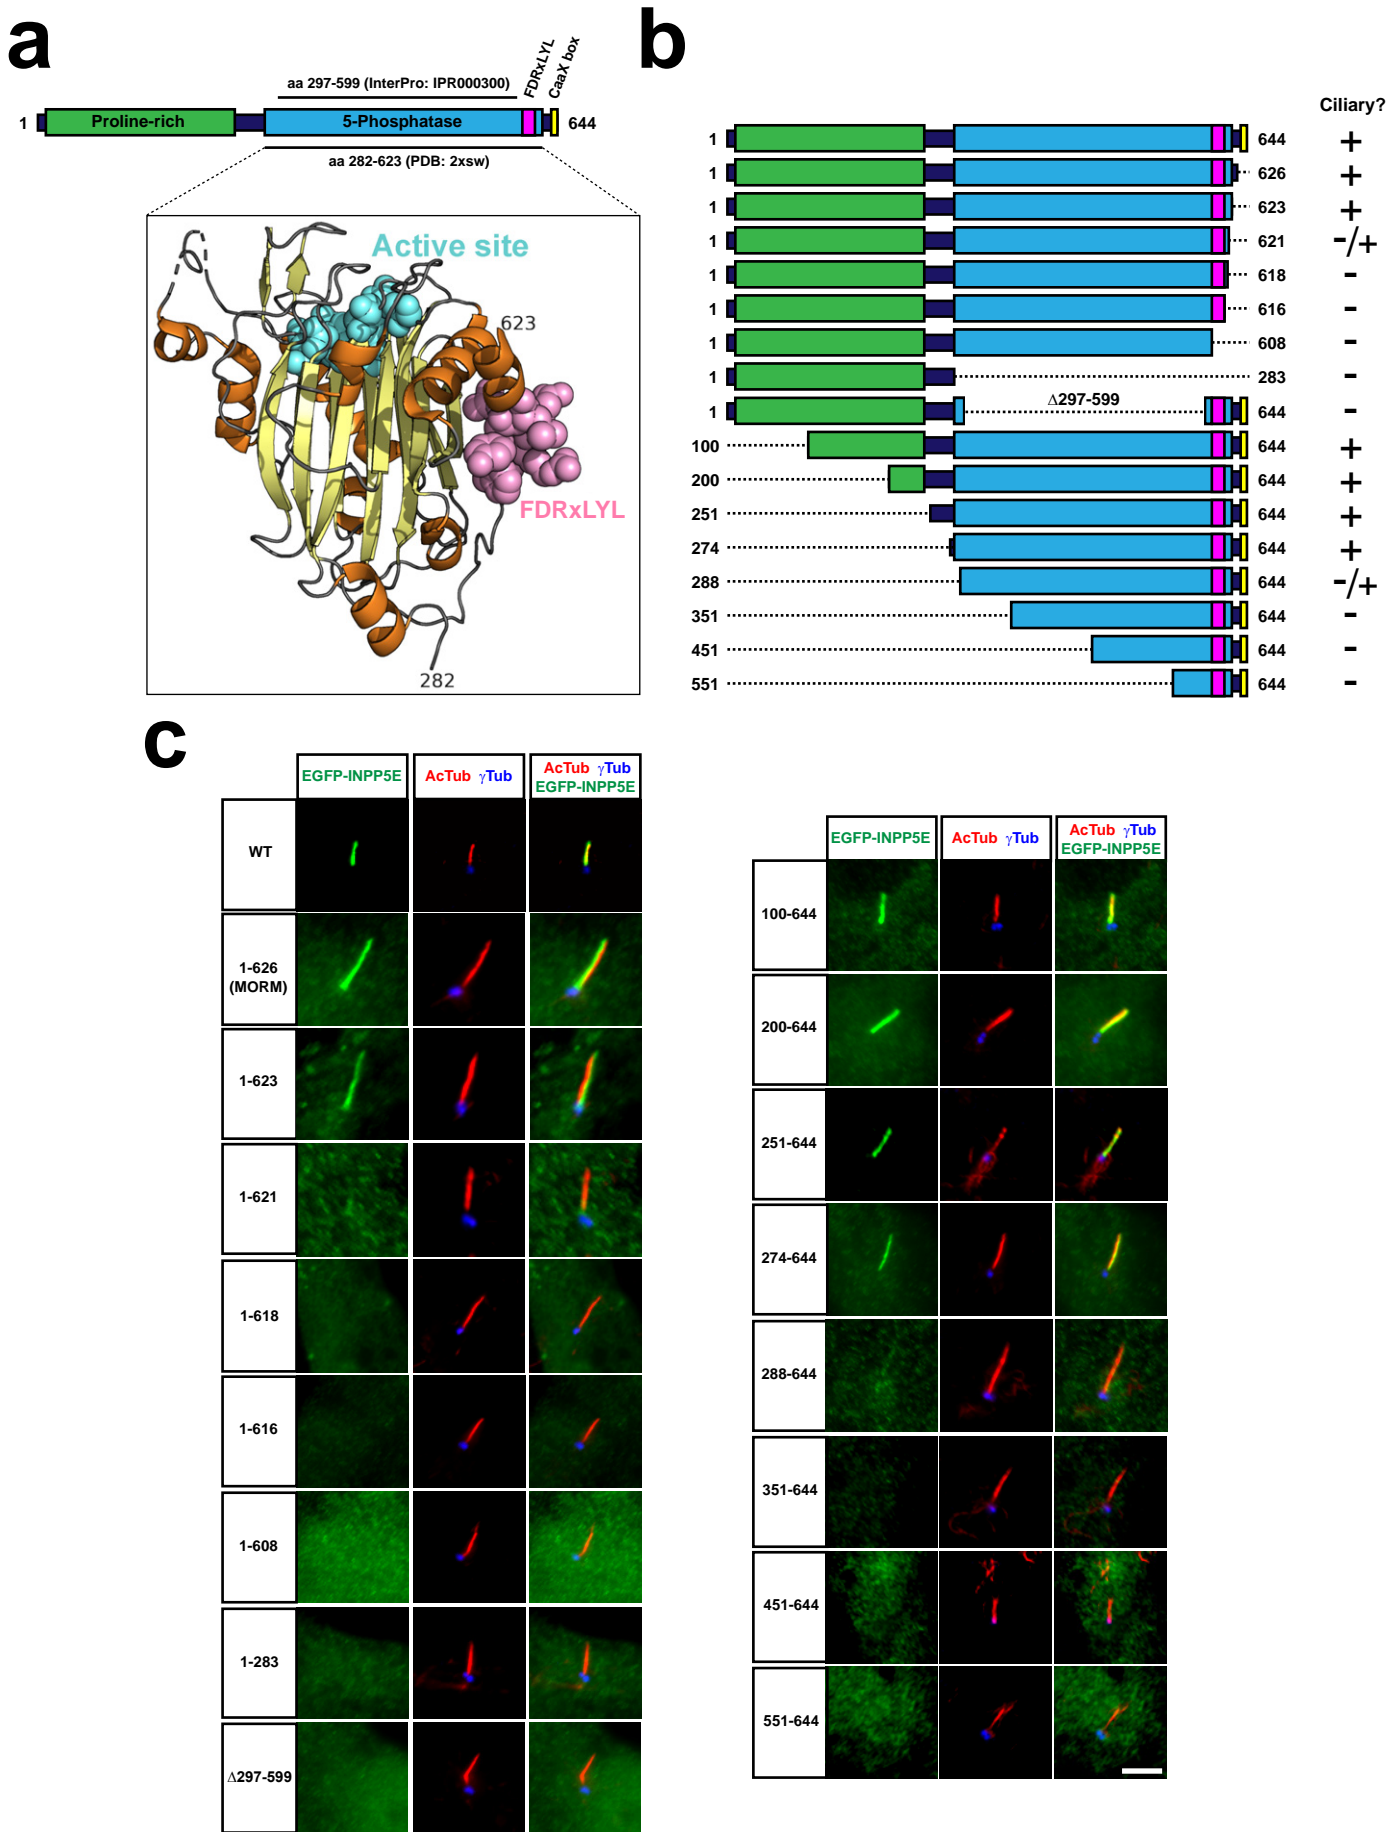

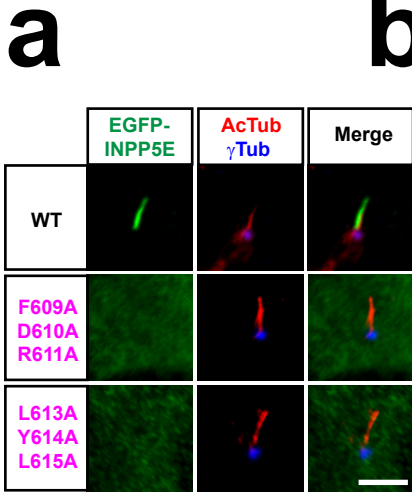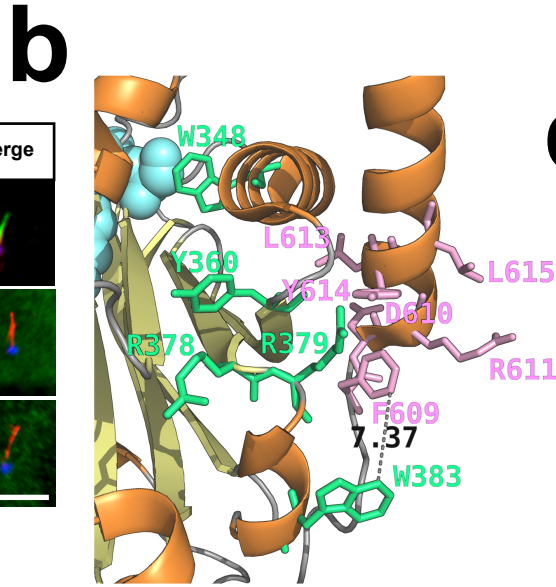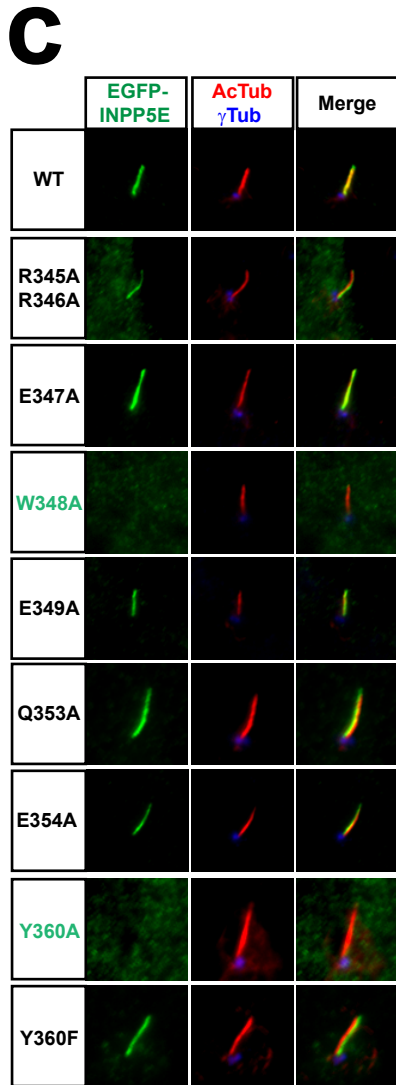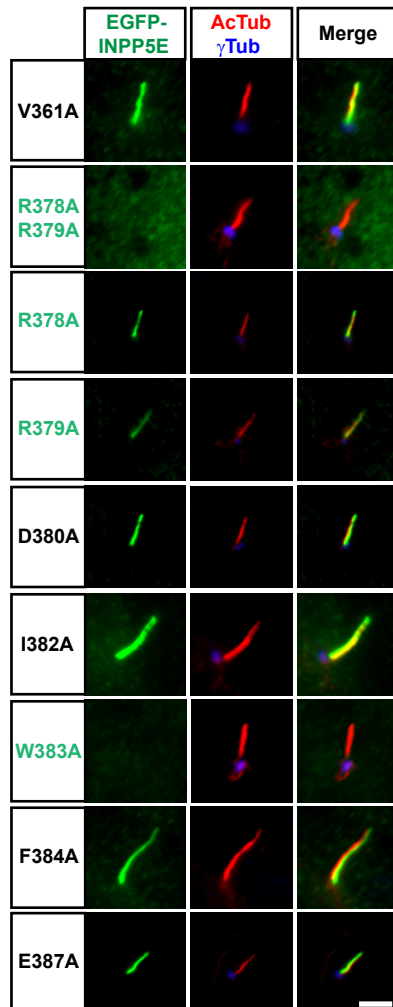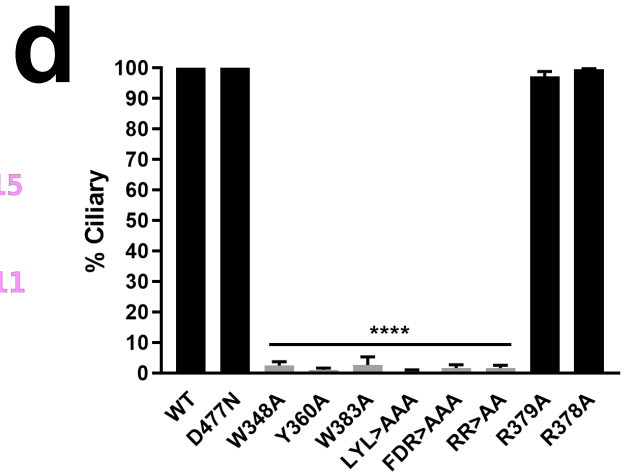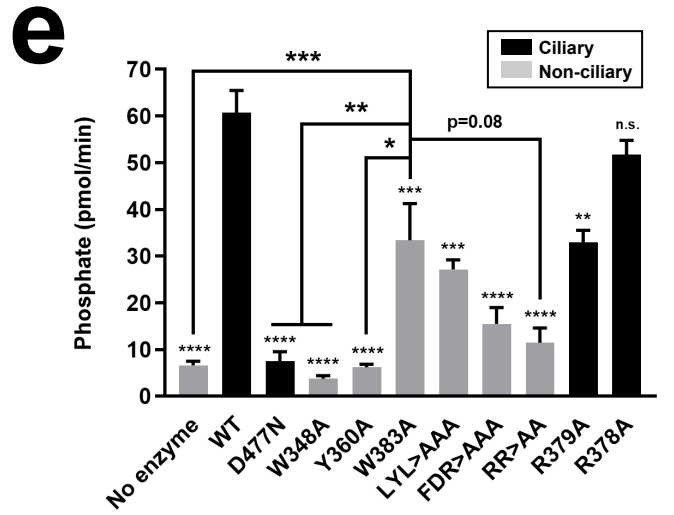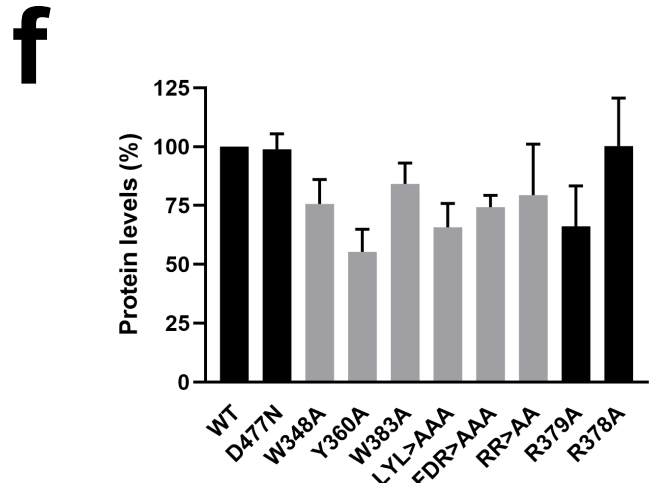

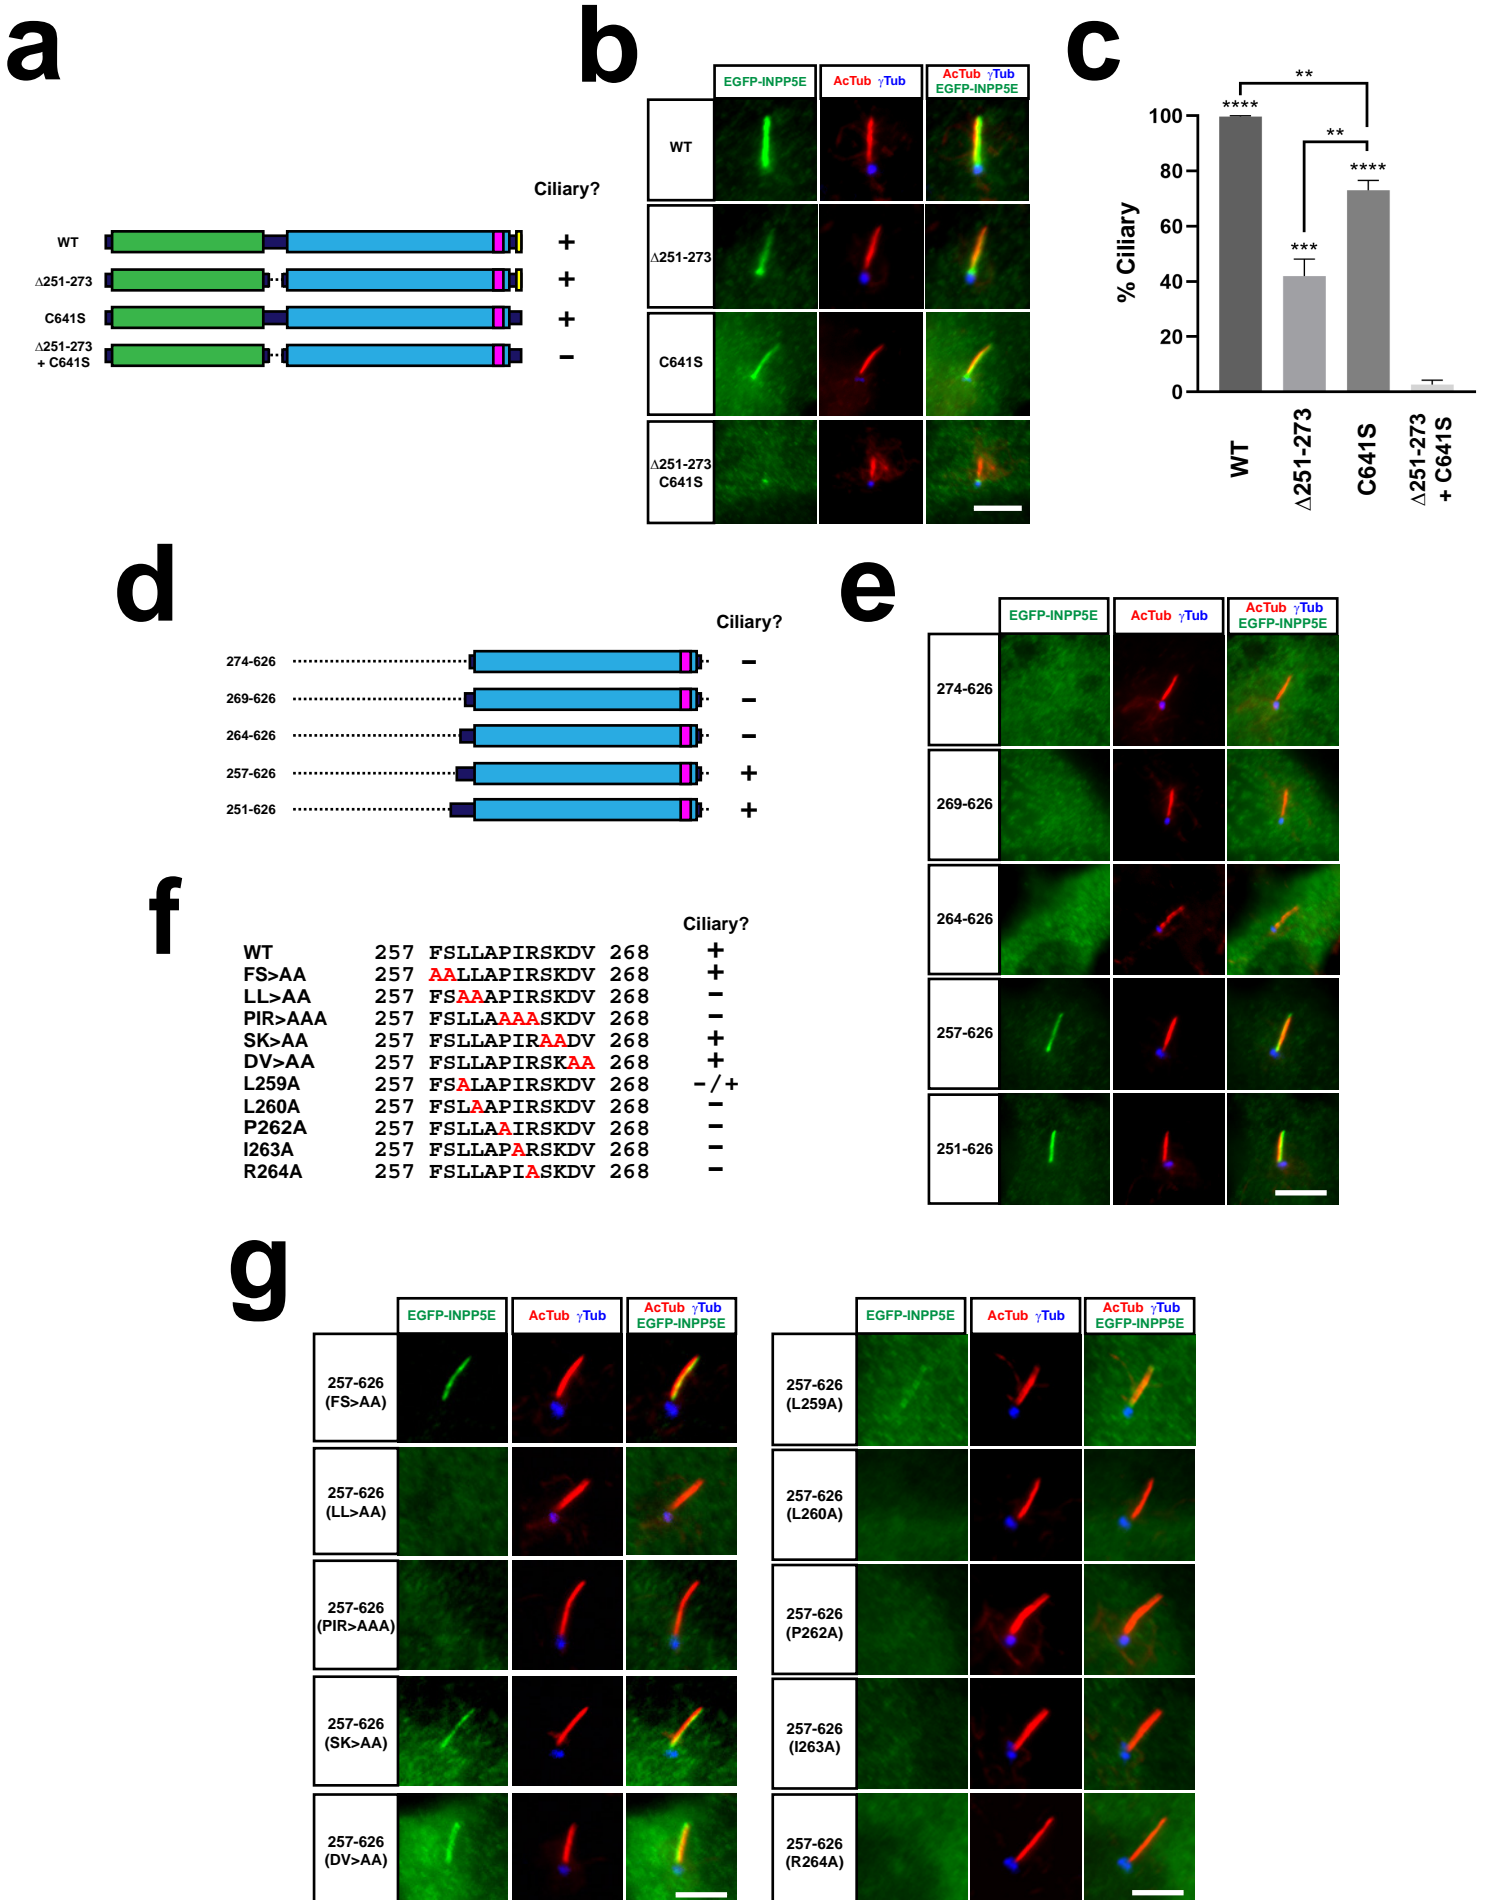



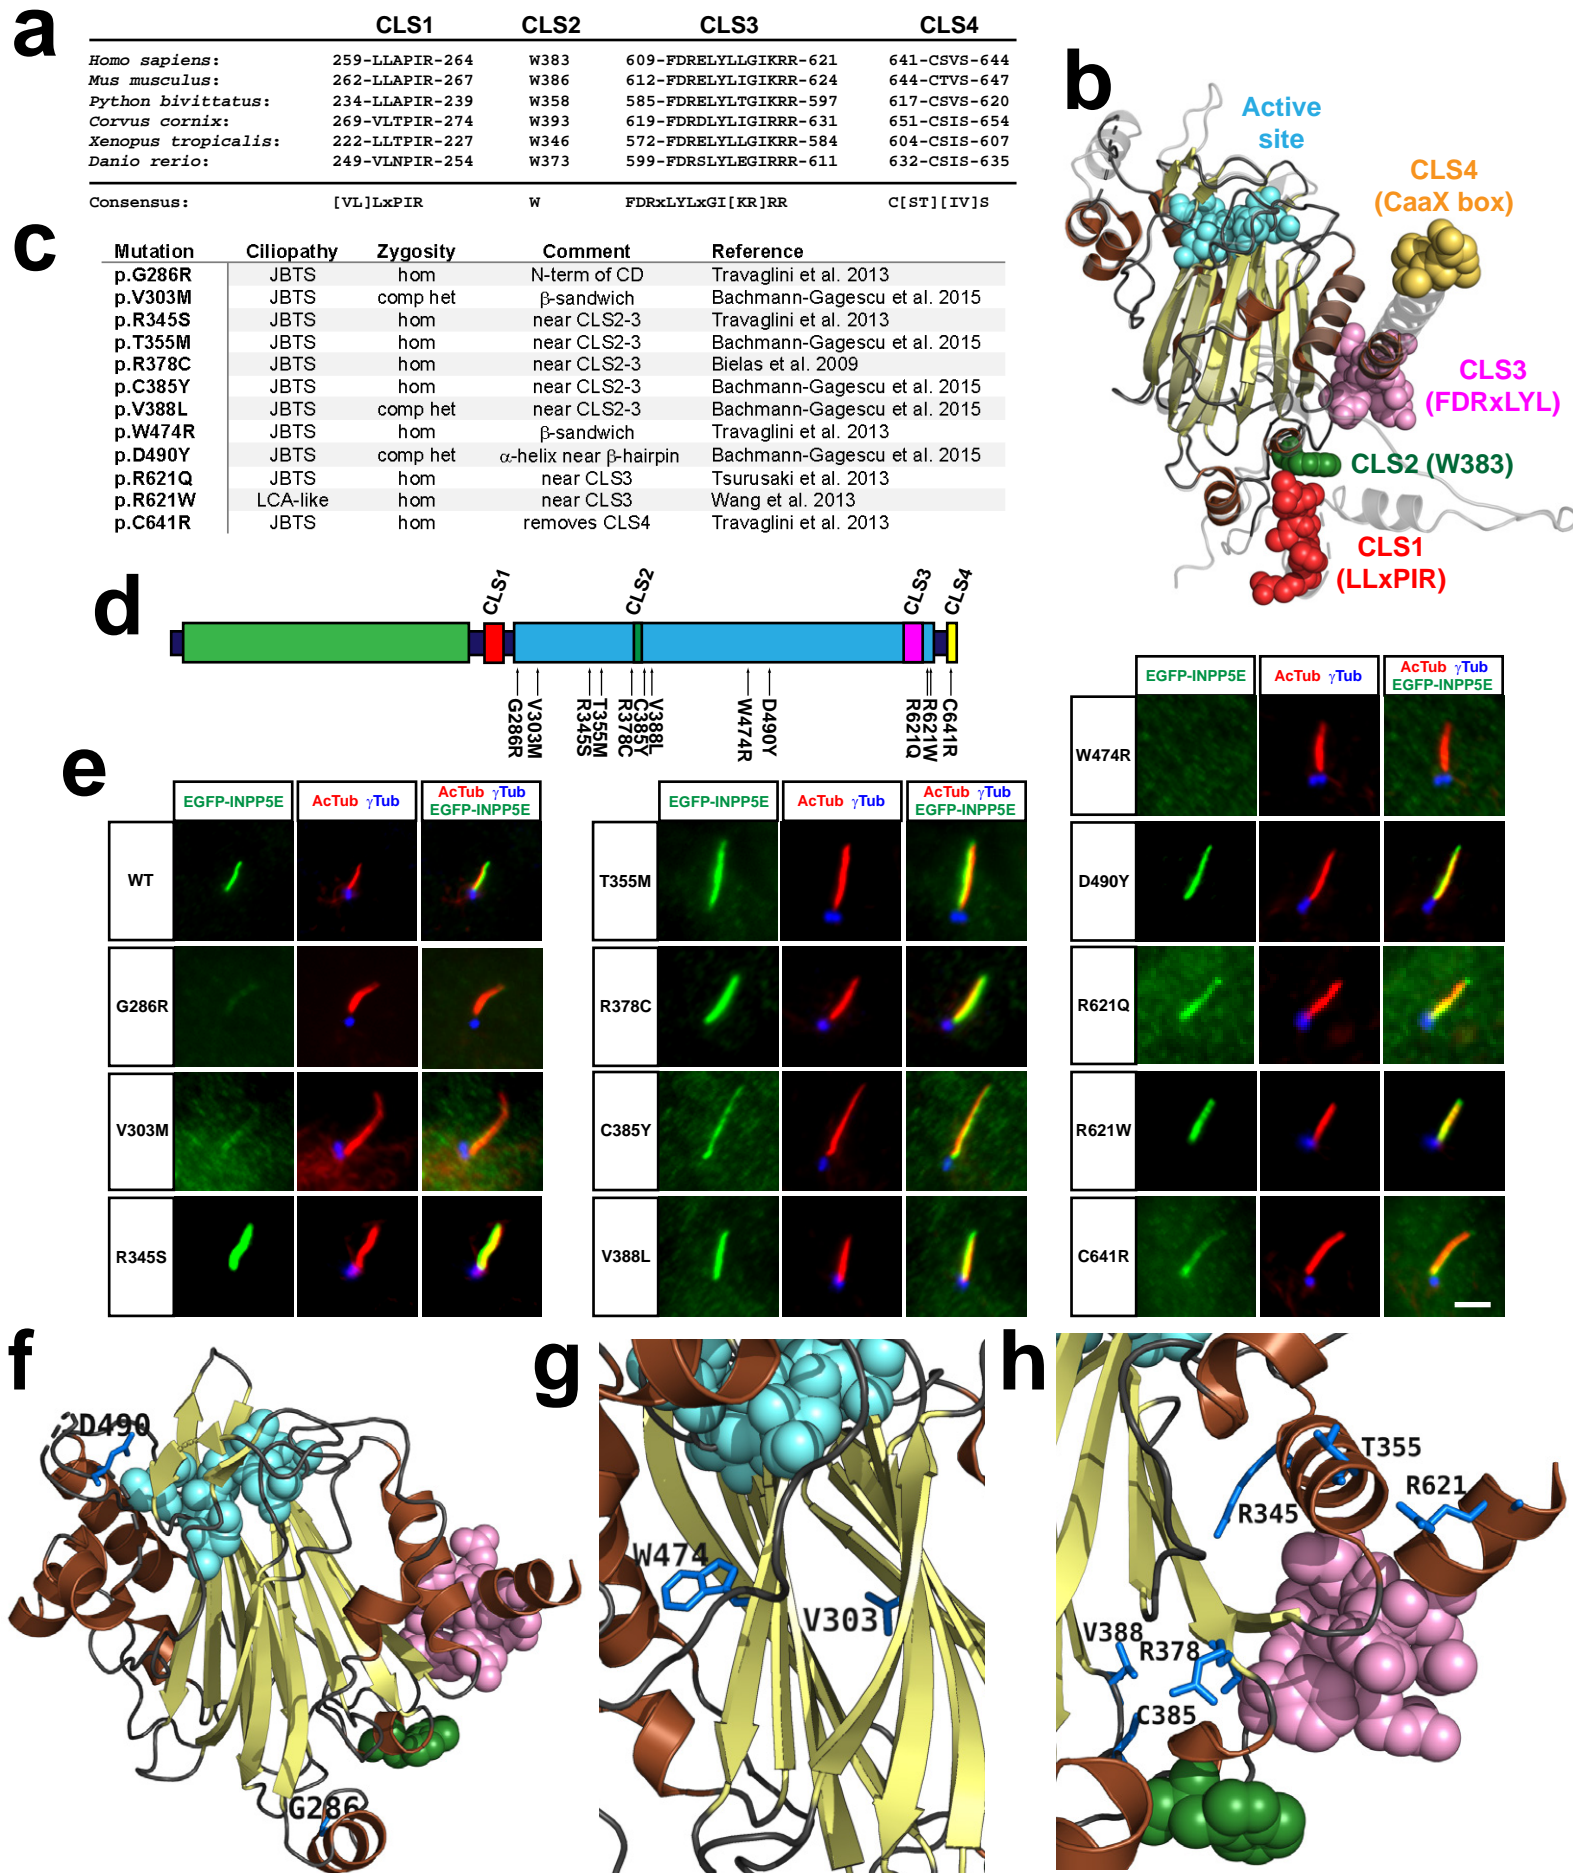

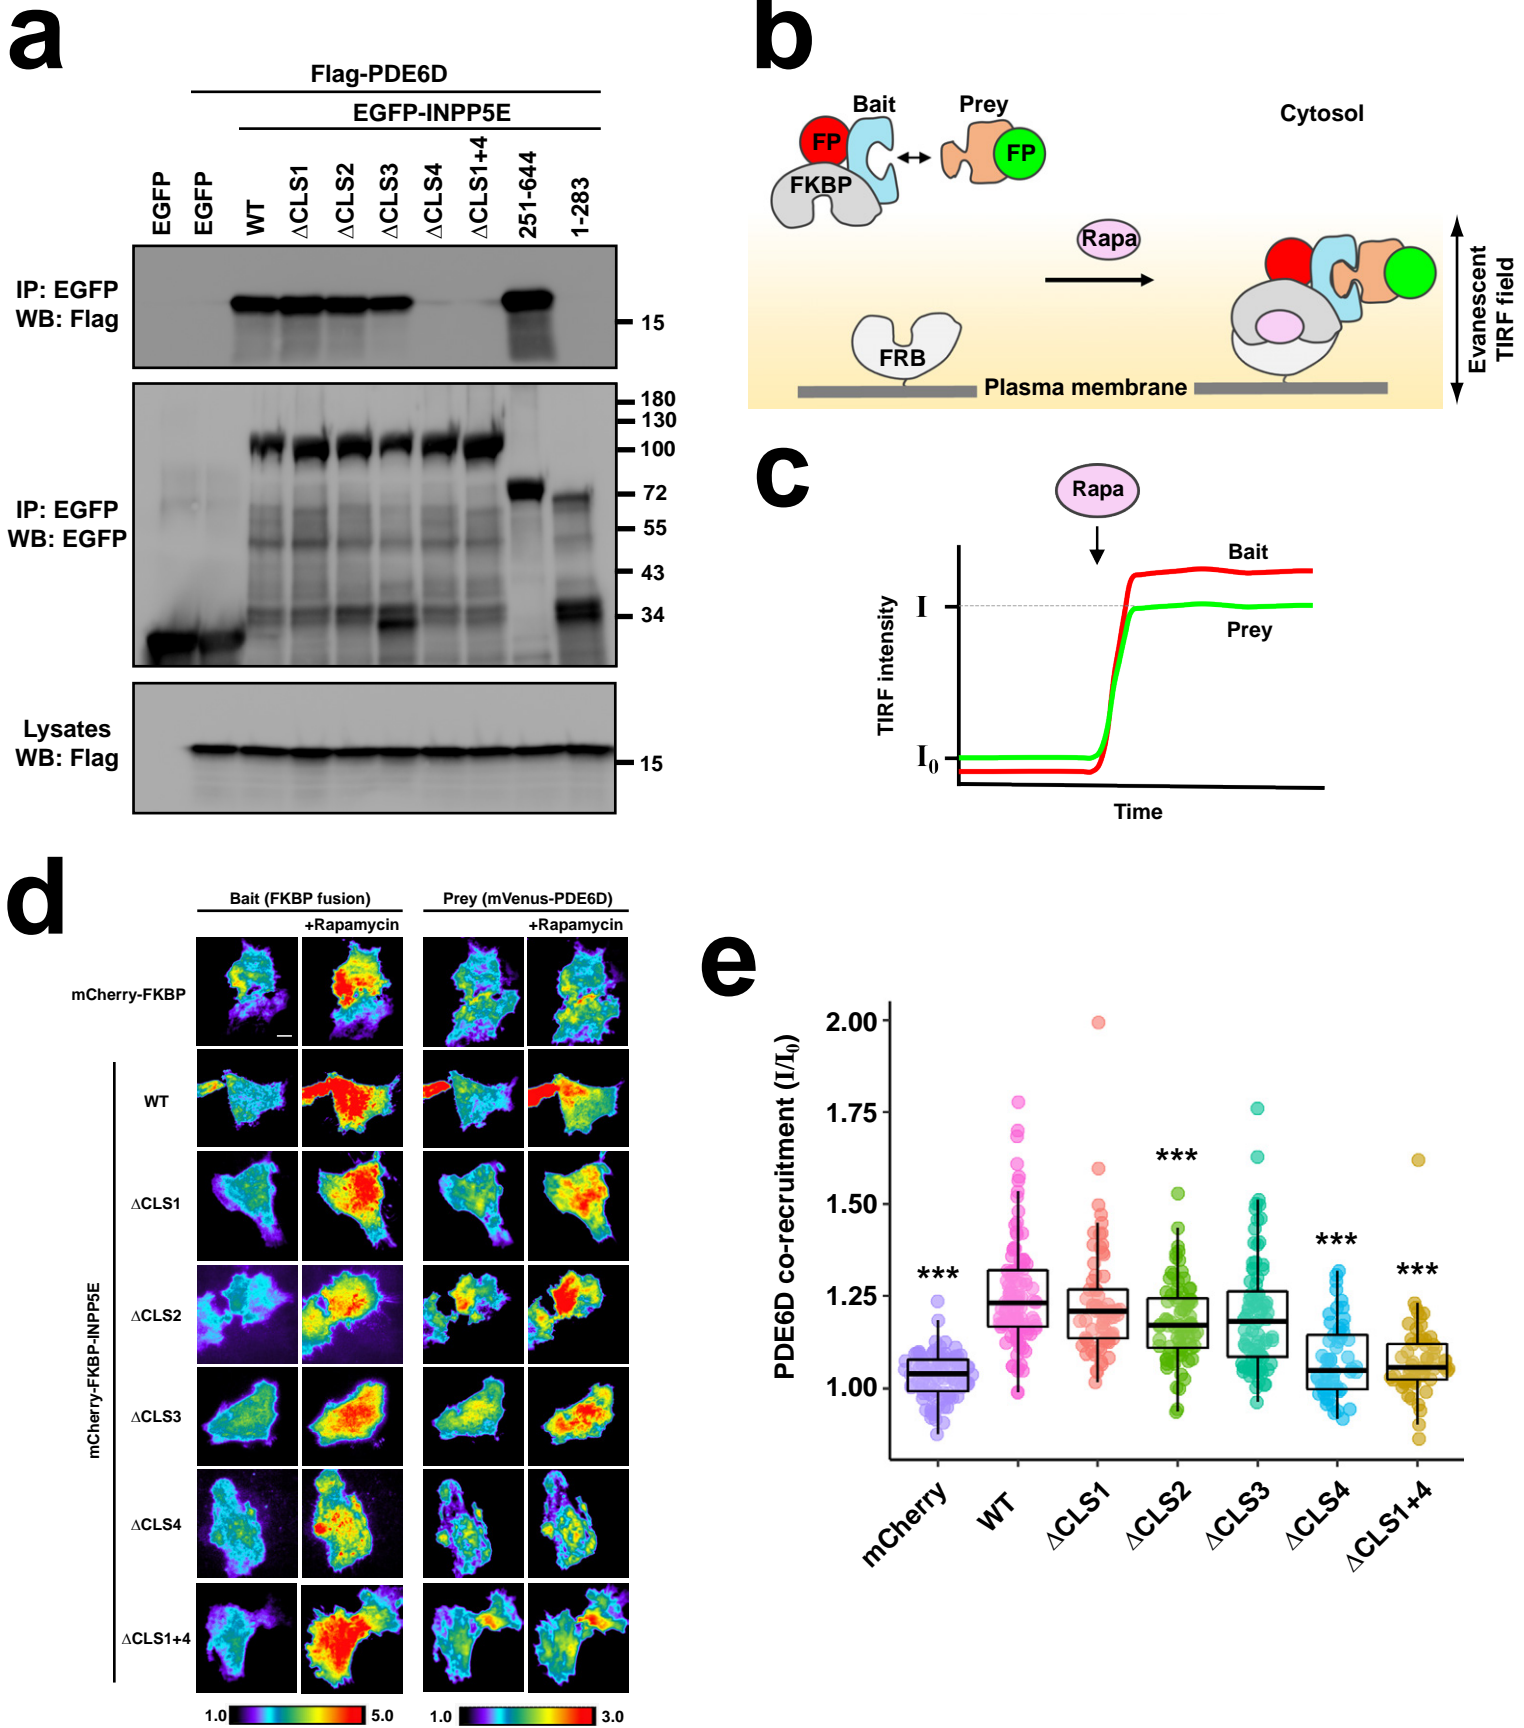

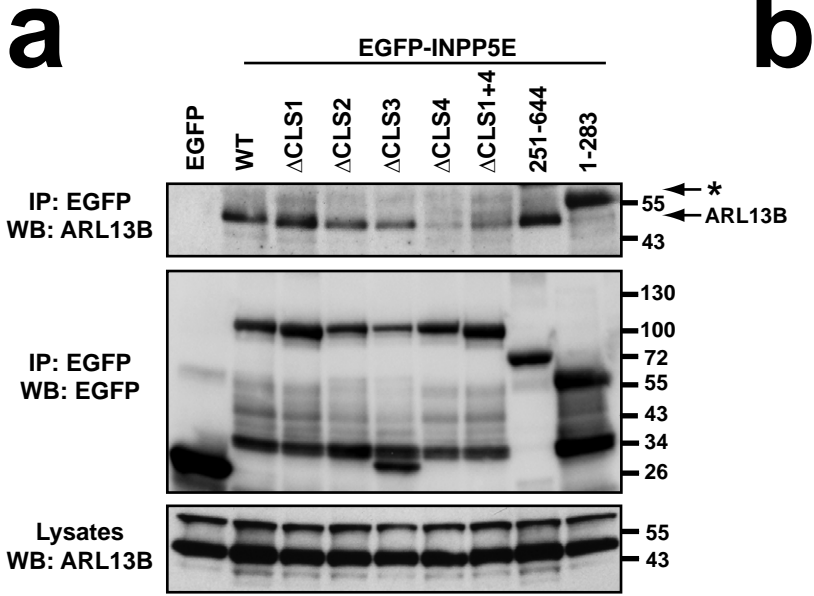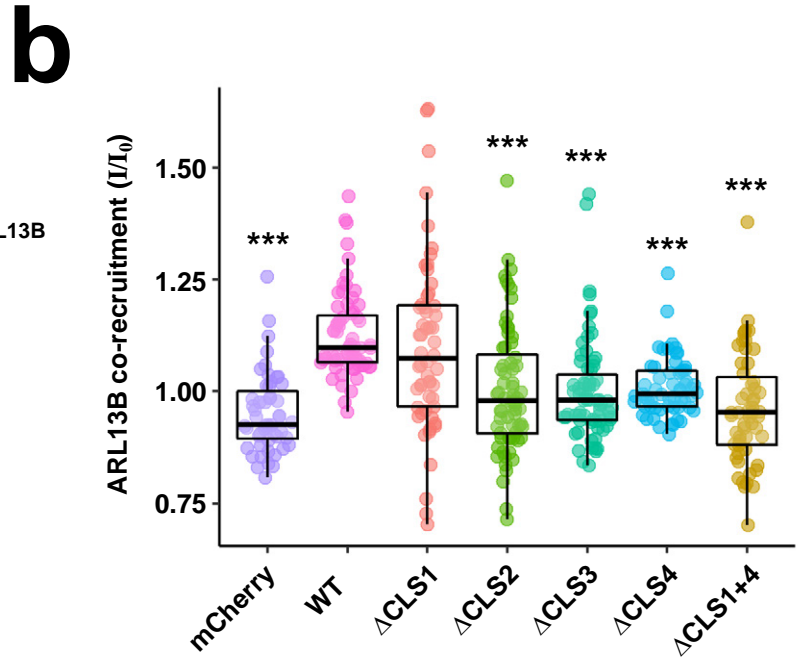

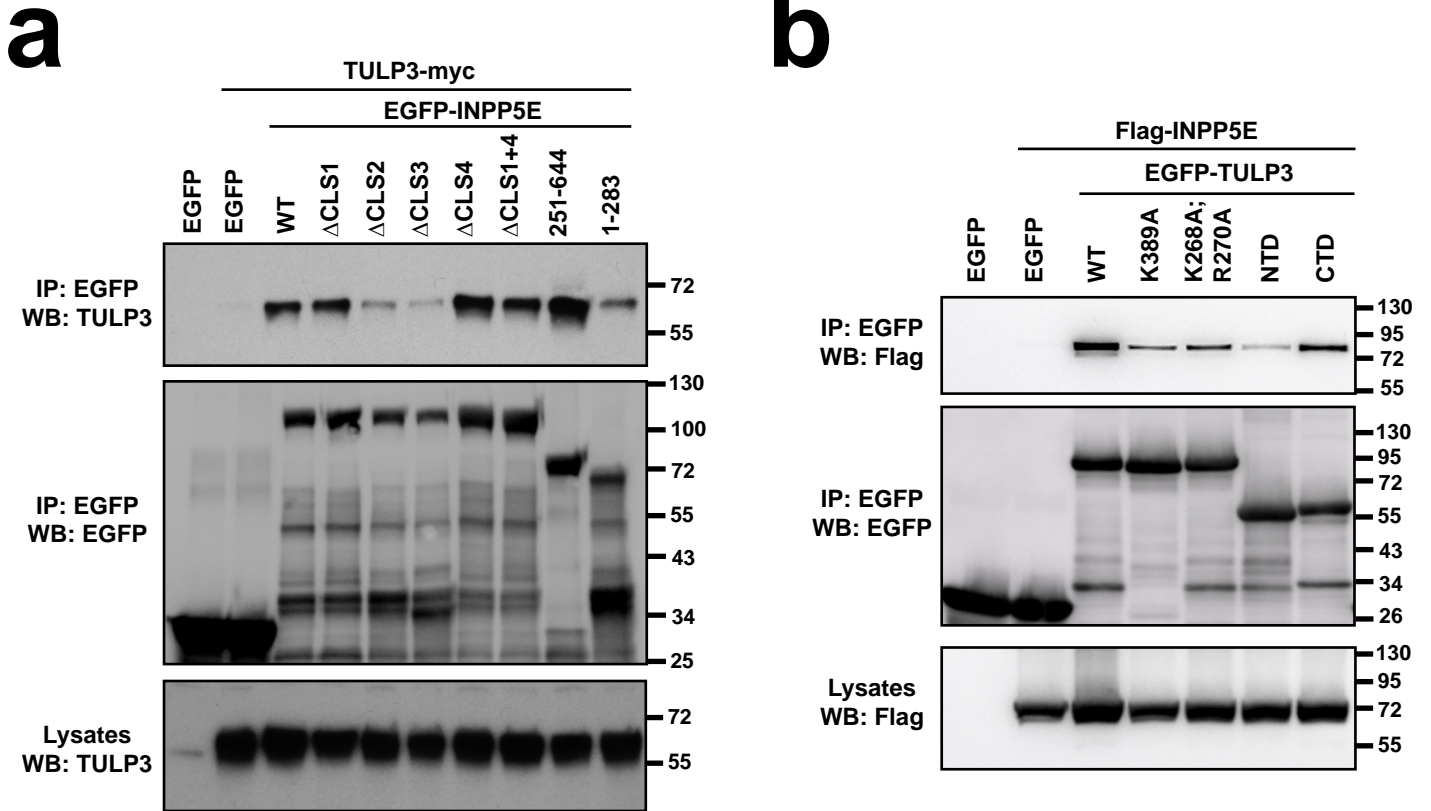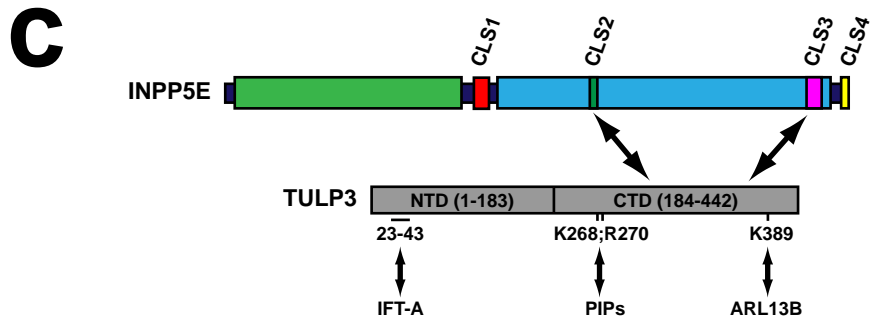

**a**

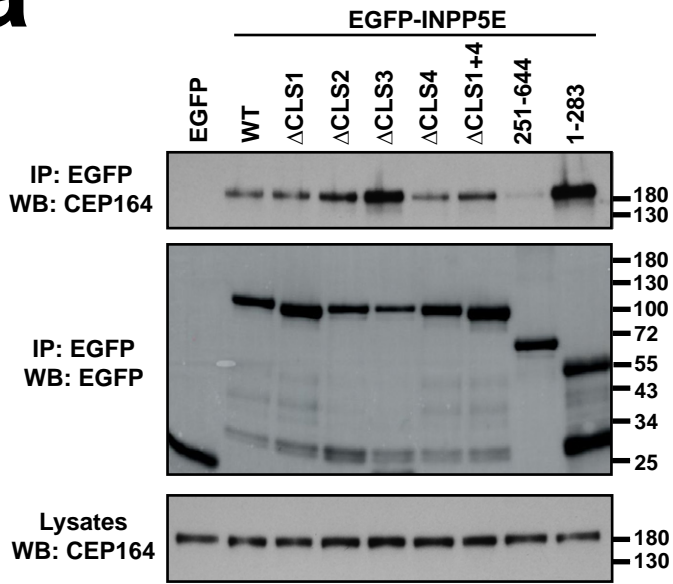

**b**

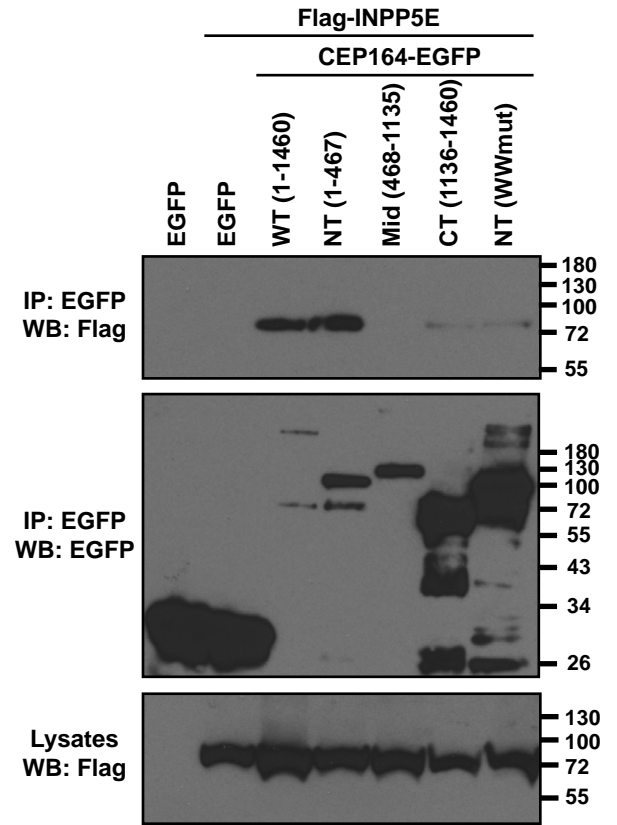

**c**

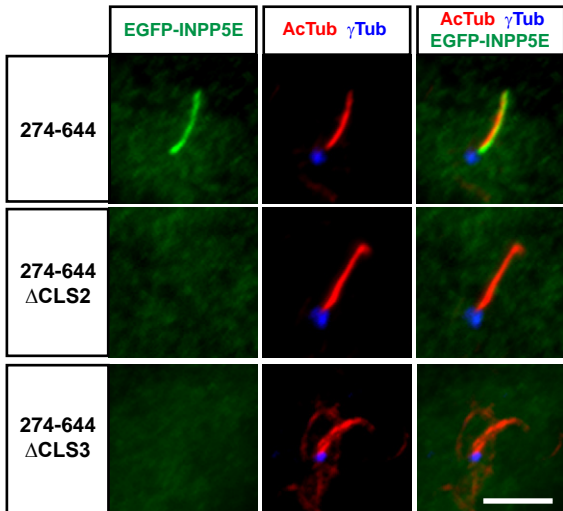

**d**

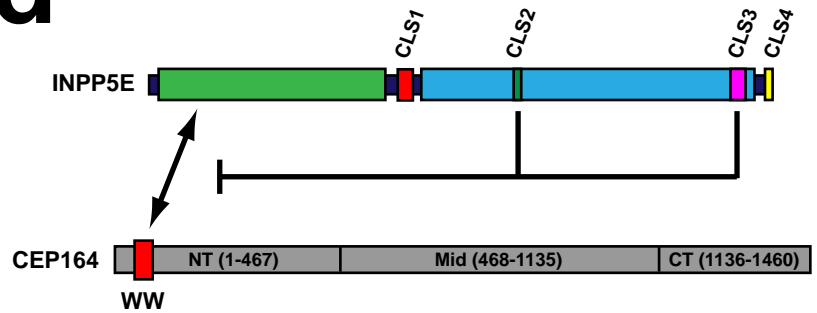

Figure 9. Cilleros-Rodriguez et al.

**a**

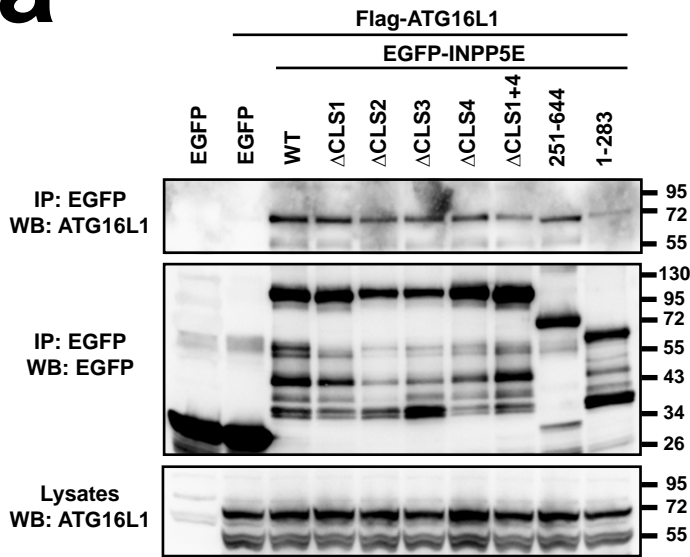

**b**

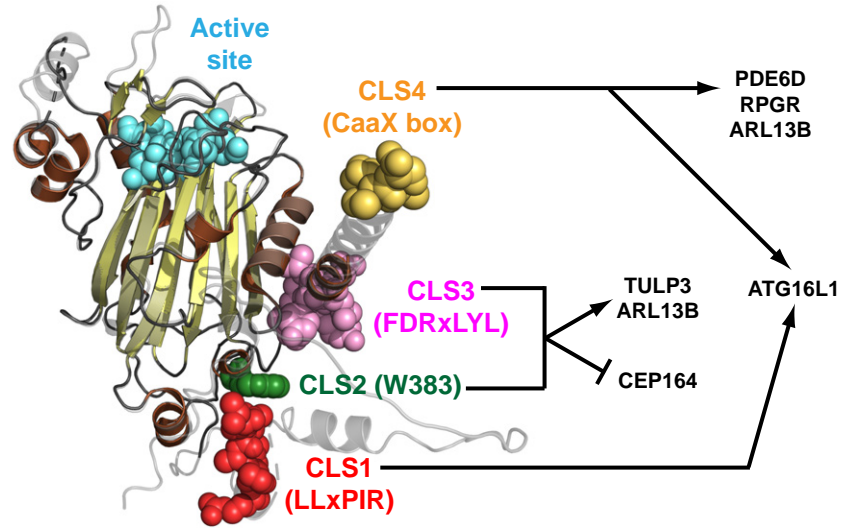

Source: https://www.biorxiv.org/content/10.1101/2022.01.25.477585v1.full.pdf
